1 **Effects of relocation on Immunological and physiological measures in**

2 **squirrel monkeys (*Saimiri boliviensis boliviensis*)**

3 Pramod Nehete<sup>1,2</sup>, Bharti P Nehete<sup>1</sup>, Greg K Wilkerson<sup>1</sup>, Steve J Schapiro<sup>1,3</sup>, and Lawrence  
4 E Williams<sup>1</sup>.

5  
6 <sup>1</sup>Department of Comparative Medicine, the University of Texas MD Anderson Cancer Center,  
7 Bastrop, Texas, USA, <sup>2</sup>The University of Texas Graduate School of Biomedical Sciences,  
8 Houston, Texas, USA, <sup>3</sup>Department of Experimental Medicine, University of Copenhagen,  
9 Copenhagen, Denmark

10

11 Corresponding Authors:

12 Pramod Nehete,

13 E-mail: [pnehete@mdanderson.org](mailto:pnehete@mdanderson.org)

14 Department of Comparative Medicine

15 MD Anderson Cancer Center,

16 Address: 650 Cool Water Drive

17 Bastrop, TX 78602

18 Telephone: 512-332-5200

19

20 L. Williams,

21 [lewillia@mdanderson.org](mailto:lewillia@mdanderson.org)

22 Department of Comparative Medicine,

23 MD Anderson Cancer Center,

24 Address: 650 Cool Water Drive

25 Bastrop, TX 78602

26 Telephone: (512) 321-3991.

27 Running title:

28 Key words: relocation, stress, Immune and physiological measurements

29

30

31 **Abstract**

32 In the present study, we have quantified the effects of transport, relocation and  
33 acclimate/adapt to their new surroundings on squirrel monkey. These responses are  
34 measured in blood samples obtained from squirrel monkeys, at different time points relative  
35 to their relocation from their old home to their new home. A variety of immunological assays  
36 are performed on the phenotype and function of peripheral blood mononuclear cells (PBMCs)  
37 in a group of squirrel monkeys that were transported by road for approximately 10 hours from  
38 one facility to another. Using a panel of human antibodies and a set of standardized human  
39 immune assays, we evaluated the phenotype of lymphocyte subsets by flow, mitogen-specific  
40 immune responses of PBMCs in vitro, and levels of cytokines at various time points including  
41 immediately before transport, immediately upon arrival, and after approximately 150 days of  
42 acclimation. We observed significant changes in T cells and subsets, NK and B cells (CD4<sup>+</sup>,  
43 CD8<sup>+</sup>, CD4<sup>+</sup>/CD8<sup>+</sup>, CD16<sup>+</sup>, and CD20<sup>+</sup>). Mitogen specific (e.g. PHA, PWM and LPS)  
44 proliferation responses, IFN-g by ELISPOT assay, and cytokines (IL-2, IL-4 and VEGF)  
45 significant changes were observed. Changes seen in the serum chemistry measurements  
46 mostly complement those seen in the hematology data. The specific goal was to empirically  
47 assess the effects of relocation stress in squirrel monkeys in terms of changes in the  
48 numbers and functions of various leukocyte subsets in the blood and the amount of time  
49 require for acclimating to their new environment. Such data will help to determine when newly  
50 arrived animals become available for use in research studies.

51

## 52 **Introduction**

53 The number of nonhuman primates (NHP) used in U.S. biomedical research reached an all-  
54 time high in 2018 year, according to data released in late September by the U.S. Department  
55 of Agriculture (USDA) (NIH report released in September,2018. Nonhuman Primate  
56 Evaluation and Analysis Part 1: Analysis of Future Demand and Supply, September 21,  
57 2018). The rising demand for NHP appears to be driven by researchers studying HIV/AIDS,  
58 cancer, the brain, Alzheimer's disease, addiction, Parkinson's, obesity/diabetes, and  
59 emerging infectious diseases like Zika and Ebola and to learn better ways to prevent negative  
60 pregnancy outcomes, including miscarriage, stillbirth, and premature birth. This research is  
61 also helping scientists to uncover information that makes human organ transplants easier and  
62 more accessible, literally giving new life to those whose kidneys, hearts, and lungs are failing.  
63 Squirrel monkeys, small New World NHP, have served an important role in studying  
64 pathogenesis of human disease conditions such as Alzheimer's disease [1-3], malaria [4-6],  
65 HIV [7], Creutzfeldt-Jakob disease [8, 9] and Giardia infection [10].  
66 Many of these nonhuman primates are raised at one facility and subsequently  
67 transported/relocated to another facility for research purposes. Relocating captive nonhuman  
68 primates from a familiar home cage or colony room to a novel environment is a potent  
69 psychosocial stressor [11-15]. The new and unfamiliar environment presents a sudden,  
70 uncontrollable, and unpredictable change. Manipulations of the environments of captive  
71 nonhuman primates often have welfare consequences to the animals, including behavioral  
72 effects, and for certain manipulations, physiological effects as well. The processes of  
73 transporting, relocating, and acclimatizing nonhuman primates across facilities represent  
74 manipulations that are likely to have welfare, behavioral, and physiological consequences to  
75 the relocated animals [16-19]. Our group and a few others have undertaken a series of

76 studies that have attempted to quantify 1) the effects of transport and relocation, and 2) the  
77 amount of time that is required for NHPs to acclimate to the new environments and  
78 management procedures after relocation; whether the relocation was to the next room or  
79 halfway around the world [20, 21]. Previously, we have reported on the effects of relocation  
80 and transport on immunological measurements in chimpanzees, rhesus and cynomolgus  
81 monkeys [22-24]. During the winter of 2008 two colonies of different species of nonhuman  
82 primates, approximately 500 squirrel monkeys (*Saimiri sciureus sciureus*, *S. boliviensis*  
83 *boliviensis*, & *S. boliviensis peruviansis*) were transported to the University of Texas MD  
84 Anderson Cancer Center, Michale E. Keeling Center for Comparative Medicine and Research  
85 at Bastrop, TX (KCCMR) from the University of South Alabama in Mobile, AL.

86 In the present study, we assessed the effects of relocation stress on dependent variables of  
87 relevance in research (i.e., immune responses and hematological and chemistry values) in  
88 squirrel monkeys. We measured the physiological indicators of stress associated with  
89 relocation and the time course of adaptation to the physical and social environments of the  
90 new setting. The focus of this project was to empirically assess the effects of transport and  
91 relocation on physiological responses in NHPs, and to quantify acclimation processes.  
92 Measuring the effects of transport, relocation, and acclimation should allow investigators to  
93 conduct studies that are minimally influenced/confounded by such manipulations.

94

## 95 **Materials and Methods:**

### 96 **Animals, Care, Diet and Housing**

97 Subjects were 30 female squirrel monkeys (*Saimiri boliviensis*), aged 3-9 years of age from  
98 the breeding colony at University of Texas MD Anderson Cancer Center, Michale E. Keeling  
99 Center for Comparative Medicine and Research at Bastrop, TX (KCCMR). Monkeys were

100 socially housed throughout the study period in social groups in two connecting cages that are  
101 4' wide x 6' tall x 14' long. Animals had *ad libitum* access to New World Primate Diet (Purina  
102 #5040) and water. In addition, they were fed either fresh fruit or vegetables daily. Specialty  
103 foods, such as seeds, peanuts, raisins, yogurt, cereals, frozen juice cups and peanut butter,  
104 were distributed daily to them as enrichment. At no time were the subjects ever food or water  
105 deprived. Subjects were also provided with destructible enrichment manipulanda and  
106 different travel/perching materials on a rotating basis to promote the occurrence of species-  
107 typical behaviors. The monkeys were examined by veterinarians before, during study period  
108 and determined to be healthy. Experiments were approved by the Institutional Animal Care  
109 and Use Committee of The University of Texas MD Anderson Cancer Center and were  
110 carried out according to the principles included in the *Guide for the Care and Use of*  
111 *Laboratory Animals*, the provisions of the Animal Welfare Act, PHS Animal Welfare Policy,  
112 and the policies of The University of Texas MD Anderson Cancer Center [25].

113 Prior to transport the animals were housed in the Primate Research Laboratory at the  
114 University of South Alabama, in social groups had been stable for at least one year. The  
115 animals were transported in modified Vari-Kennels<sup>®</sup> that provided perching and bedding  
116 appropriate for squirrel monkeys. Each kennel was provided with a hydration system gel  
117 pack, fresh vegetable and fruits, and non-human primate food biscuits. The squirrel monkeys  
118 were manually caught and placed in the kennels with a social partner between 1600-1700  
119 hours. Entire social groups were moved at the same time. The trip from Mobile, AL to  
120 Bastrop, TX was made in a commercial self-contained, USDA approved, trailer that was  
121 climate controlled. The trailer left Mobile, AL between 1700-1730 and arrived in Bastrop, TX  
122 0700-0800 the following morning. Beginning at approximately 0800 the kennels were  
123 removed from the trailer and placed in front of their new social housing units. Once an  
124 inventory was taken and all animals were found to be present and in the correct social

125 grouping, each kennel was opened, and the animals were released into their new housing. At  
126 no point were the animals sedated. The entire colony of 500 animals was moved over a five  
127 weeks period following the same routine procedures.

### 128 **Collection of samples and Peripheral blood mononuclear cells (PBMC)**

129 Ten animals from three of separate shipments, for a total of 30, were sampled for this study.  
130 Baseline blood samples were obtained one day prior to the relocation as part of the animals'  
131 "pre-shipment" physical exam. The next blood samples "Day 1" were obtained within the first  
132 few hours upon arrival at the Keeling Center as part of the animals' first "quarantine" physical  
133 exam. The final used for this study was collected at "Day150" post-arrival to monitor the  
134 animals' adaptation to their assigned housing conditions at the Keeling Center. Blood  
135 samples (3 mL) were collected, 1.5mL in EDTA anti-coagulant tubes and 1.5 mL in  
136 coagulation CBC tubes, from the femoral vein at the different time points. The animals were  
137 manually restrained for each of the three blood draws, and no sedatives or other chemical  
138 restraints were utilized. All blood sample collections occurred in the morning (8-10AM) before  
139 the animals were fed. Before the separation of peripheral blood mononuclear cells (PBMC)  
140 from the blood samples, plasma was collected and stored immediately at -80°C until  
141 analyzed. The PBMC prepared from the blood samples by the standard ficoll-hypaque  
142 density-gradient centrifugation were used for various immune assays [23, 26]. All blood  
143 samples were processed at the Keeling Center following domestic overnight shipment (for the  
144 pre-travel blood collections) or within 2-4 hours of collection at the Keeling Center (for arrival  
145 and day 150 post-arrival samples). The PBMCs, freshly prepared from whole blood collected  
146 in EDTA tubes, were more than 90% viable as determined by the trypan blue exclusion  
147 method. For each immune assay,  $10^5$  cells /well were used for various immune assay.

### 148 **Complete blood count and blood chemistry analysis.**

149 EDTA whole blood samples were analyzed for a complete blood count on Siemens Advia 120  
150 Hematology Analyzer, Tarrytown, NY. The Parameters analyzed included: total WBC, total  
151 RBC, hemoglobin, hematocrit, RBC indices, WBC differential counts, and platelet count.  
152 Serum Chemistry was analyzed on Chemistry Analyzer (Beckman Coulter AU680®  
153 Chemistry Analyzer). The different parameters analyzed were for example, Glucose, Na, K,  
154 Cl, CO<sub>2</sub>, Cholesterol, Triglycerides, Iron, BUN, Creatinine etc.).

### 155 **Flow cytometry:**

156 A series of commercially available human monoclonal antibodies that cross react with  
157 nonhuman primate mononuclear cells were used in flow cytometry analyses as described  
158 previously [10, 26-28]. Briefly, 100µl of whole blood from each sample was added to each  
159 12mm×75mm polystyrene tube (Falcon, Lincoln Park, NJ, USA) containing pre-added  
160 cocktail of monoclonal antibodies against CD3, CD4 and CD8 CD16 and CD20 (CD3-PE,  
161 clone SP-34; CD4-PerCP, clone L200; CD8-FITC, clone SK1, CD16 APC (clone 3G8), and  
162 CD20-APC, clone L27 (all from BD Biosciences, San Diego, USA) and incubated for 15 min  
163 at room temperature in the dark. Red blood cells were lysed with 1x RBC lysing solution  
164 (Becton Dickinson, USA) following the manufacturer's instructions. The samples were  
165 washed thoroughly in 1x phosphate-buffer saline (PBS) by centrifugation; then cell sediments  
166 were suspended in 1% paraformaldehyde buffer (300ul) and acquired on a on a  
167 Fluorescence Activated Cell Sorter (FACS) Calibur flow cytometer (BD Biosciences, San  
168 Jose, CA, USA). All samples acquired in this study were compensated using the single-color  
169 stained cells. Lymphocytes that were gated on forward scatter versus side scatter dot plot  
170 were used to analyze CD3<sup>+</sup>, CD4<sup>+</sup>, and CD8<sup>+</sup> T cell and CD20<sup>+</sup> B cell lymphocyte subsets  
171 using FlowJo software (Tree Star, Inc., Ashland, OR, USA).  
172 For analysis of NK cells, a separate tube with 100ul of blood was stained with separate  
173 cocktail of consisting of -CD3 PE (clone SP-34 and CD16 APC (clone 3G8), (all from BD

174 Pharmingen, San Jose, USA) antibodies, as described above. The gating scheme for T-cell,  
175 B and NK markers in peripheral blood from a representative cynomolgus macaques has been  
176 identified previously [10]. The absolute number of lymphocytes and monocytes, as obtained  
177 from hematologic analysis, was used to convert the percentages identified through FACS  
178 analysis into absolute numbers for each of the lymphocyte and monocyte subset populations.

### 179 ***in vitro* mitogen stimulation of PBMC**

180 The PBMCs, freshly prepared from whole blood collected in EDTA tubes, were more than  
181 90% viable as determined by the trypan blue exclusion method. For each immune assay,  $10^5$   
182 cells /well were used for various immune assay. Briefly, aliquots of PBMCs ( $10^5$ /well) were  
183 seeded in triplicate wells of 96-well, flat-bottom plates and individually stimulated with the  
184 mitogens phytohemagglutinin (PHA), lipopolysaccharide (LPS), and pokeweed mitogen  
185 (PWM) (Sigma, St Louis, MO, USA), each at 1  $\mu$ g/mL final concentration. The culture medium  
186 without added mitogens served as a negative control.

### 187 **Proliferation Assay**

188 The proliferation of PBMC samples from the monkeys obtained at different time points during  
189 the study were determined by the standard [ $^3$ H] thymidine incorporation assay, using  
190 mitogens PHA, LPS and PWM (each at 1  $\mu$ g/mL final concentration). The culture medium  
191 served as negative control. Aliquots of the PBMC ( $10^5$ /well) were suspended in RPMI-1640  
192 culture medium supplemented with 10% fetal calf serum and seeded in triplicate wells of U-  
193 bottom 96-well plates and incubated with mitogens for 72hr at 37°C in humidified 5% CO<sub>2</sub>  
194 atmosphere. During the last 16-18 hr., 1  $\mu$ Cr of  $^3$ H thymidine was added. Cells were  
195 harvested onto filter strips for estimating  $^3$ H-incorporation and counted using a liquid  
196 scintillation counter. The proliferative response in terms of stimulation index (SI) was



197 calculated as fold-increase in the radioactivity over that of the cells cultured in medium alone.

198 The responses to antigens were considered positive when the SI values were  $\leq 2.0$  [29, 30].

### 199 **ELISPOT Assay for Detecting IFN- $\gamma$ producing Cells**

200 Freshly-prepared PBMC were stimulated with the different mitogens (PHA, PWM and LPS) to  
201 determine the numbers of IFN- $\gamma$  producing cells by the ELISPOT assay using the

202 methodology reported earlier [10, 31, 32]. Briefly, aliquots of PBMC ( $10^5$ /well) were seeded

203 in duplicate wells of 96-well plates (MABTECH) pre-coated with the primary IFN- $\gamma$  antibody

204 and stimulated with mitogens PHA, LPS and PWM (each at 1  $\mu$ g/mL final concentration).

205 After incubation for 24 hr. at 37°C, the cells were removed, and the wells were thoroughly

206 washed with PBS. Subsequently, 100  $\mu$ L of biotinylated secondary antibody to IFN- $\gamma$

207 (detection antibody) was added to the wells for 3 hr. at 37°C followed by avidin-peroxidase

208 treatment for another 30 min. Purple colored spots representing individual cells secreting

209 IFN $\gamma$  were developed using freshly-prepared substrate (0.3 mg/mL of 3-amino-9-ethyl-

210 carbazole) in 0.1 M sodium acetate buffer, containing 0.015% hydrogen peroxide. Plates

211 were washed to stop color development, and spots were counted by an independent agency

212 (Zellnet Consulting, New Jersey, NJ) using the KS-ELISPOT automatic system (Carl Zeiss,

213 Inc. Thornwood, NY) for the quantitative analysis of the number of IFN- $\gamma$  spot forming cells

214 (SFC) for  $10^5$  input PBMC. Responses were considered positive when the numbers of spot

215 forming cells (SFC) with the test antigen were at least five and were five above the

216 background control values from cells cultured in the medium alone.

### 217 **ELISA Assay for Detecting IFN- $\alpha$ producing Cells**

218 Commercial Cytokines kits were used to measure the concentration of IFN- $\alpha$  (PBL

219 Biomedical Laboratories, Piscataway, NJ) in cell culture supernatants following PHA, LPS

220 and PWM (each at 1 ug/mL final concentration) stimulation of PBMC from squirrel monkeys.

221 ELISA for IFN- $\alpha$  cytokine were performed according to the manufacturer's instructions.

222 The minimum IFN- a detectable concentration was 2.9 pg/mL.

### 223 **NK Assay:**

224 The natural killer activity (NK) was measured as previously described [33]. Briefly, PBMCs

225 from blood were purified by centrifugation on a Ficoll-Hypaque density gradient as described

226 above. Serial two-fold dilutions of the PBMC (effectors) were mixed with  $^{51}\text{Cr}$ -labeled target

227 cells K562 in triplicate wells of microtiter plates to attain the E: T ratio of 100:1, 50:1, 25:1 and

228 12.5:1. After 4-h incubation, 100  $\mu\text{l}$  of supernatant was collected from each well and the

229 amount of  $^{51}\text{Cr}$  released was determined using the  $\gamma$ -counter. To account for the maximum

230 release, the cells were incubated with 5% Triton X-100. Spontaneous release was

231 determined from target cells incubated without added effector cells. The % of specific lysis

232 was calculated by the following formula:

233 % Specific lysis = (experimental release-spontaneous release) / (maximum release-

234 spontaneous release) X 100.

### 235 **Cytokine multiplex assays**

236 Cytokine were measured in cell-free PBMC supernatant using MILLIPLEX-MAP human

237 cytokine/chemokine magnetic bead panel (EMD Millipore Corporation, Billerica, MA, USA)

238 according to the manufacturer's instructions. There is 91.4%–98.1% homology between the

239 nucleotide sequences of SQM cytokine genes and published sequences of equivalent human

240 and nonhuman primate genes [34, 35]. Briefly, aliquots of PBMC ( $10^5$ /well) were seeded in

241 duplicate wells of 96-well plates and stimulated for 24 hrs. with mitogens PHA, PWM and LPS

242 (each at 1 ug/mL final concentration) supernatant samples were centrifuged (14,000x g for 5

243 min) and 25 mL of aliquots were used in assay. The 96-well filter plate was blocked with

244 assay buffer for 10 min at room temperature, washed, and 25 mL of standard or control  
245 samples were dispersed into appropriate wells. After adding 25 mL of beads to each well, the  
246 plate was incubated on a shaker overnight at 40C. The next day, after washing two times with  
247 wash buffer, the plate was incubated with detection antibody for 1 h at room temperature and  
248 again incubated with 25 mL of Streptavidin-Phycoerythrin for 30 min at room temperature.  
249 After washing two times with wash buffer, 150 mL of sheath fluid was added into each well  
250 and multianalyte profiling was performed on the Bio-Plex 200 system (Luminex X MAP  
251 technology). Calibration microspheres for classification and reporter readings as well as  
252 sheath fluid, assay, and wash buffer were also purchased from Bio-Rad (Hercules, CA, USA).  
253 Acquired fluorescence data were analyzed by the Bio-Plex manager 5.0 (Bio-Rad, Hercules,  
254 CA, USA). All steps of incubations were performed on a shaker. The minimum detectable  
255 concentration was calculated by the Multiplex Analyst immunoassay analysis Software from  
256 Millipore. Cytokines were measured using Nonhuman Primate Cytokine kit with IFN- $\gamma$ , IFN- $\alpha$ ,  
257 IL-1b, IL-2, IL-4, IL-6, MIP-1b, TNF- $\alpha$ , and VEGF, from Millipore Corporation (Billerica, MA)  
258 using the cytokine bead array (CBA) methodology according to the manufacturers' protocols  
259 and as described previously [36].

## 260 **Statistical comparisons**

261 The CBC, chemistry, and immunological data are analyzed using a series of within-subjects  
262 One-way Analyses of Variance. The primary comparisons are across the levels of the  
263 independent variable; transport and relocation (pre-transport, immediately after transport and  
264 after a 150day acclimation referred to as Pre, Day 1, day 150 samples in the results). Two-  
265 tailed tests, appropriate correction factors, and planned comparison techniques are utilized to  
266 fully explore the data.

## 267 **Results**

268 To understand the effect of transport and relocation on immune responses of PBMCs of

269 squirrel monkeys, we performed detailed analyses of cell-mediated immune responses,  
270 including assays for 1) Phenotypic analysis by flow cytometry, 2) proliferation, 3) IFN- $\gamma$  by  
271 ELISPOT and IFN- $\alpha$  by ELISA, in response to stimulation with mitogens (e.g., PHA, PWM,  
272 and LPS), 4) cytokines in cell supernatant and 5) complete blood count and serum chemistry  
273 analysis before, and after relocation.

274 The lymphocytes and monocytes were first gated based on forward scatter (FCS)  
275 versus side scatter (SSC), and then CD3<sup>+</sup> T cells, CD14<sup>+</sup> (monocytes), CD3<sup>+</sup>CD16<sup>+</sup> (NK)  
276 cells, CD3<sup>+</sup>CD16<sup>+</sup> NKT cells, and CD20<sup>+</sup> B cells were positively identified. The specificity of  
277 staining for the various markers was ascertained according to the isotype control antibody  
278 staining used for each pair of combination markers, as shown.

279 **Fig 1 (A). Gating scheme for phenotype analyses of the various cell markers in the peripheral**  
280 **blood from a representative squirrel monkey.**

281

## 282 **Influence of relocation on major lymphocyte subsets in the peripheral blood**

283 We first checked cross activity of a large panel of commercially available antibodies from  
284 different commercial companies at the concentration recommended by the supplier using  
285 blood from squirrel monkeys as described previously [37]. The reactivity was considered  
286 positive if the signal obtained gave a dot plot clearly distinct from the negative control dot plot  
287 using an isotype-matched antibody. As positive controls, fresh blood obtained from normal  
288 healthy rhesus monkey as donors were stained in parallel. Based on the data showing a high  
289 degree of cross reactivity of human monoclonal antibodies to different lymphocyte subsets in  
290 squirrel monkeys, we began probing into immunological indicators of stress associated with  
291 relocation.

292 Using the monoclonal antibodies listed in Table 1 we determined the levels of the different  
293 lymphocyte subsets and established normal value ranges in the blood of a total of 30 adult

294 *Saimiri* monkeys from the breeding unit of MD Anderson Cancer Center at Bastrop.  
295 Specifically, we analyzed for the T cells (CD3+), NK cells (CD16+), B cells (CD20+ cells),  
296 helper T cells (CD3+, CD4+) and cytotoxic/suppressor T cells (CD3+, CD8+) using human  
297 monoclonal antibodies that exhibited cross-reactivity with squirrel monkey PBMC. Details of  
298 the specificity, clone names, isotypes and supplier of the commercially available human  
299 monoclonal antibodies are shown in Table 1.

**Table 1.**

Human specific monoclonal antibodies used for squirrel monkey FACS and its reactivity

| Antibody | Supplier | Clone  | Isotype         | Reactivity |
|----------|----------|--------|-----------------|------------|
| CD3      | BD       | SP34   | IgG3, $\lambda$ | +          |
| CD4      | BD       | L200   | IgG1 $\kappa$   | +          |
| CD8      | BD       | RPA-T8 | IgG1 $\kappa$   | +          |
| CD16     | BD       | 3G8    | IgG1 $\kappa$   | +          |
| CD20     | BD       | L27    | IgG1 $\kappa$   | +          |

300  
301 The distribution lymphocyte subsets in blood of squirrel monkeys are shown at day pre  
302 shipment, post day 2 and post day150 after relocation in Fig 1B. CD3+ T cell count (F  
303 (1.7,25.9) =15,  $p < 0.05$ ) showed significant changes across time with the Day 1 arrival levels  
304 lower than the Pre and day 150 post-arrival samples. CD4+ T cell counts  
305 (F(1.5,22.6)=105, $p < 0.05$ ), CD8+ T cell counts (F(1.3,19.3)= 6.54,  $p < 0.05$ ), and  
306 CD4+CD8+(double positive) T cell counts (F(1.1,16.6)=226, $p < 0.05$ ) showed significant  
307 changes across time with the day 150 levels significantly higher than both the Pre and Day 1  
308 and Day 150 samples. CD16+ NK cells cell counts (F (1.7,25.6) =5.81,  $p < 0.05$ ) showed  
309 significant changes across time with Day 1 levels significantly lower than the Pre and Day 1  
310 samples. CD20+ B cells counts (F (1.2,18) =9.58,  $p < 0.05$ ) showed significant changes across  
311 time with the Day 1 levels significantly higher than both the Pre and Day 1 samples.

312 CD3+CD16+ NK T cells cell counts (F (1.7,25.3) =5.66, p<0.05) showed significant changes  
313 across time with the Day 1 levels significantly lower than Pre.

314 **Figure 1 (B). Relocation-dependent differences in lymphocytes in squirrel monkeys.**

315

### 316 **Proliferative responses**

317 Since, we found significant differences in expression of T, and B cells, we investigated  
318 functional hallmark of proliferation of PBMCs samples from the squirrel monkeys. We  
319 measured proliferation in <sup>3</sup>H thymidine incorporation assay (Fig 2A). The proliferative  
320 responses to PHA (F (2,36) =47.1, p<0.0001), and PWM (F (2,51) =33.7, p<0.0001) were  
321 significantly higher at post day 2 shipment compare to pre and day150. No statistically  
322 significant differences were observed for proliferative response stimulation with LPS (Fig 2A).

323 **Figure 2 (A). Proliferative response of PBMCs to mitogens.**

324

### 325 **ELISPOT assay for detecting mitogen-specific IFN- $\gamma$ producing cells in squirrel** 326 **monkeys**

327 Additional functional activity was measured for IFN $\gamma$  production by PBMCs in response to  
328 stimulation with PHA, PWM, and LPS by the cytokine ELISPOT assay. As shown in Fig 2B,  
329 squirrel monkey PBMC showed significantly higher numbers of IFN- $\gamma$  producing cells in  
330 response to stimulation with PHA (F(2,51)=136.4,p<0.0001), PWM (F(2,51)=136.4,p<0.0001)  
331 and LPS (F(2,51)=113.4,p<0.0001) showed significant changes across time with the Day 150  
332 levels significantly higher than both the Pre and Day 1.

333 **Figure 2 (B). IFN- $\gamma$  ELISPOT response to mitogens.**

334

### 335 **ELISA assay for detecting mitogen-specific IFN- $\alpha$ producing cells in squirrel monkeys**

336 Freshly isolated PBMCs were either unstimulated (medium) or stimulated with PHA, PWM  
337 and LPS (1 $\mu$ g/mL) for 24 hr. and supernatant was collected to measure IFN- $\alpha$  (Fig.3A) by  
338 ELISA. In general, Day 150 levels were intermediate between the Pre and Day 1 samples.  
339 No significant differences across time were observed for IFN-a ELISA with regard to the PHA,  
340 PWM, and LPS assays (Fig 3A).

341 **Figure 3 (A). IFN- $\alpha$  ELISA response to mitogens.**

342

343 **Influence of relocation on natural killer activity.** PBMCs from squirrel monkey were  
344 analyzed for NK activity using a standard <sup>51</sup>chromium (Cr) release assay. We observed no  
345 significant differences were observed in natural killer activity at different effector to Target  
346 ratio (E: T100:1, E: T 50:1, and E: T25:1) (Fig 3B).

347 **Figure 3 (B). Relocation-dependent differences in natural killer activity.**

348

### 349 **Cytokine multiplex assays**

350 Freshly isolated PBMCs were either unstimulated (medium) or stimulated with PHA, PWM  
351 and LPS (1 $\mu$ g/mL) for 24 hr. and cell supernatant was collected frozen and used for  
352 multiplex cytokines assay using cytokines: IL-1 $\beta$ , IL-2, IL-4, IL-6, MIP-1  $\beta$ , TNF- $\alpha$ , and  
353 VEGF. Only IL-2 (PHA) (F (1.8,25.6) =7.29, p<0.05), IL-4 (PHA)(F (1.8,25.4) =4.3, p<0.05),  
354 and VEGF (PHA) (F (1.5,21.6) =5.58, p<0.05) showed significant differences across time with  
355 Day 1 arrival levels (Fig 4).

356 **Figure 4. Relocation-dependent differences in Cytokine.**

### 357 **Hematology**

358 The blood samples collected at pre shipment Day 1 and Day150 was subjected hematology  
359 and analysis is shown in Fig 5A and 5B. The white blood cell count ( $F(1,12) = 12.2, p < 0.05$ )  
360 and relative count of lymphocytes ( $F(1.2,14.4) = 16.9, p < 0.05$ ) both showed a significant  
361 change across time, with the Pre levels significantly higher than both the Day 1  
362 measurements and the post Day 150 samples. The monocyte cell count was significantly  
363 different across time ( $F(1.5,19.5) = 5.38, p < 0.05$ ) with a significant difference between the  
364 Pre levels and Day 150 levels. The neutrophil count ( $F(1.5,20.3) = 50.6, p < 0.05$ ) and  
365 hematocrit ( $F(1.8,22.9) = 12.6, p < 0.05$ ) both showed a significant change across time, with  
366 the Pre significantly higher than the post-treatment samples and the Day 150 samples. The  
367 eosinophil levels were significantly different across time ( $F(1.5,19.1) = 5.83, p < 0.05$ ) with Day  
368 1 levels significantly higher compared to post Day 150 levels. The hemoglobin levels showed  
369 significant changes across time ( $F(1.7,21.3) = 9.94, p \leq 0.05$ ) with Day 1 levels significantly  
370 lower than both Pre and Day 1 levels. The red blood cell count ( $F(1.6,21,1) = 8.07, p < 0.05$ ),  
371 MCHC ( $F(1.9,24.7) = 4.08, p < 0.05$ ), and RDW ( $F(1.7,21.6) = 7.59, p < 0.05$ ) all were  
372 significantly different across time with Pre levels significantly higher than the Day1 levels.  
373 MCV, MCH, PLT, MPV, and segmented neutrophil levels showed no significant changes  
374 across time.

### 375 **Serum Chemistry**

376 Similarly, the blood samples collected at pre shipment, Day 1 and Day 150 was subjected to  
377 serum chemistry analysis and is shown in Fig 5C, 5D and 5E. Total bilirubin levels  
378 ( $F(1.3,16.9) = 12.8, p < 0.05$ ), ALT levels ( $F(1.7,23.8) = 26.7, p < 0.05$ ), CK levels  
379 ( $F(1,21.6) = 8.9, p < 0.05$ ), BUN levels ( $F(1.4,30.1) = 14.6, p < 0.05$ ), Glucose levels  
380 ( $F(1.4,19.7) = 8.22, p < 0.05$ ), Osmolarity ( $F(1.9,27) = 8.09, p < 0.05$ ), Phosphorus levels  
381 ( $F(1.4,31.3) = 9.96, p < 0.05$ ), and Sodium levels ( $F(1.7,24.5) = 12.0, p < 0.05$ ) all showed similar



382 significant changes across time, with Day 1 levels significantly higher than Pre and Day 1 and  
383 Day 150 samples. Triglyceride levels ( $F(1.7,24,2) = 183, p < 0.05$ ) showed a significant  
384 change across time with Day 1 levels significantly lower than both Pre and the Day 1 and 150  
385 samples. Albumin levels ( $F(1.6,23.1) = 8.58, p < 0.05$ ) and Creatinine levels ( $F(1.6,35.5)$   
386  $= 15.2, p < 0.05$ ) both showed significant changes across time with Day 1 and Day 150 levels  
387 significantly lower than both Pre and Day 1 samples. Globulin levels ( $F(1.5,21.3) = 14.6,$   
388  $p < 0.05$ ) and Anion Gap ( $F(1.8,39.4) = 5.48, p < 0.05$ ) showed similar significant changes  
389 across time but with post Day 150 levels significantly higher than both Pre and Day 1 arrival  
390 samples. Iron levels ( $F(1.7,23.9) = 5.73, p < 0.05$ ) and cholesterol ( $F(1.2,17.8) = 1.07, p < 0.05$ )  
391 showed significant changes across time with the Pre samples significantly higher than Day 1  
392 arrival. CO<sub>2</sub> levels ( $F(1.4,31.1) = 2.73, p < 0.05$ ) showed significant changes across time with  
393 post Day 150 levels significantly higher than Pre samples. LDH levels ( $F(1.8,23.6) = 7.44,$   
394  $p < 0.05$ ) showed significant changes across time with levels Day 1 arrival levels significantly  
395 higher than post Day 150 samples. Pre LDH levels were lower than the Day 1 arrival levels  
396 but not significantly so. AST levels ( $F(1,14.3) = 32, p < 0.05$ ) showed significant changes  
397 across time with Day 1 arrival samples significantly higher than Pre and post Day 150  
398 samples. The post Day 150 AST sample results were also significantly higher than Pre levels.  
399 GGT, ALK, Total protein, calcium, potassium, chloride, and TIBC levels showed no significant  
400 changes across time.

401 **Figure 5A-5E. Relocation-dependent differences in Hematology (5A and 5B) and blood**  
402 **Chemistry (5C, D, E).**

403

404 **Effect of Acclimatization:**

405 For most of the hematology measurements all animals had returned to Pre levels at the Day  
406 150 sample. Exceptions include Total Lymphocytes which were higher 150 days post

407 transport ( $F(1,9) = 13.0$ ,  $\eta_p^2 = 0.6$ ), and RDW which remained lower than Pre ( $F(1,9) = 7.6$ ,  
408  $\eta_p^2 = 0.5$ ).

409 These hematology effects can mostly be explained by mild dehydration during  
410 transport, including changes in the RBC, Hgb, and HCT, even though the animals were  
411 provided with water and gel-packs during transport. Transient reductions in the number of  
412 WBC's have been seen with stress as part of intense physical exercise. Unpredictable  
413 movements of the truck and crate may have tired and stressed the animals leading to the  
414 reduction in WBC's seen the day of arrival. However, changes in some of the serum  
415 chemistry measurements that are related to liver function may be related. Only two  
416 hematology measurements showed any post Day 150 effects, higher WBC and lower RDW in  
417 the squirrel monkeys. These results are not immediately explainable but do illustrate the  
418 types of post Day 150 changes in baseline values that can occur with relocation.  
419 Changes seen in the serum chemistry measurements mostly complement those seen in the  
420 hematology data. Mild dehydration during the transport may be the causes for changes in  
421 Osmolality and sodium levels in the squirrel monkeys. indirectly related may be changes in  
422 albumin, phosphorus, and triglycerides that are usually associated with kidney lesions.  
423 Elevated levels of CK and LDH, seen are associated with strenuous exercise. Like the fall in  
424 WBC's, this effect is likely due to the animals having to compensate for the unpredictable  
425 truck and cage movements. The increase in glucose levels in the squirrel monkeys as well  
426 as the decreased levels of iron can be attributed to overall stress and sleep deprivation.  
427 Changes in the ALT, AST, and BUN levels in the squirrel monkeys, and total bilirubin in both  
428 is usually indicative of liver lesions. Taken together with the platelet changes seen in *squirrel*  
429 *monkeys*, these changes suggest that transport has some transient effect on liver function  
430 through a as yet unknown mechanism.

431 Long term changes seen in BUN, GGT, Chloride, and cholesterol levels in the squirrel  
432 monkeys may be an accommodation to the new living arrangements. Although the new  
433 cages had a similar volume, they were constructed out of a thermo-neutral material  
434 (Tresva®) rather than sheet metal. They also received more cage enrichment and were on a  
435 different feeding and cleaning schedule. Any of these factors, or other changes in  
436 environment and routine, may be enough to alter the physiology of the animals enough to  
437 make it different from the original, pre-shipment, baseline.

### 438 ***Discussion***

439 The data from this study establish clear physiological and immune system effects of  
440 transportation and acclimation for squirrel monkeys. Transport involves many factors that  
441 can be considered to negatively affect an animal's physiological state, including anesthesia;  
442 loading and unloading; separation from familiar social partners and environments; novel  
443 noises, smells, and vibrations; and relocation to a new and unfamiliar environment. The  
444 negative effects of these events have been assessed in several species [38-41], as changes  
445 in serum levels of cortisol and other physiological measures. Others have previously studied  
446 the effects of transport, relocation, and/or acclimatization on nonhumans primates [11, 24,  
447 41-45], however these studies were conducted on old world and ape species, and focused on  
448 limited sets of behavioral or physiological responses and reported a decrease in lymphocytes  
449 in cynomolgus macaques, while Kagira, Ngotho (46) found changes in hematological  
450 parameters for recently trapped vervet. There are considerably more data available on the  
451 effects of transport and relocation in other, non-primate animal species. These reports found  
452 similar effects for mice, rats, dogs, and pigs as a function of transport, relocation, and/or  
453 acclimatization as suggested by changes in blood glucose, cholesterol, and blood urea  
454 nitrogen [47, 48]; lymphocyte counts [38]; and white blood cell counts, body weights, and  
455 natural killer cell activity [15, 40].

456 The data from the present study provide some insight into the time that it takes squirrel to  
457 acclimatize to their new surroundings. Some standard clinical chemistry and hematologic  
458 values appeared to return to Pre levels by about 6 weeks after arrival, while others did not.  
459 Some of the cell-mediated immune responses that were affected by transport and relocation  
460 also did not return to Pre levels. The squirrel monkeys were still affected by the transport  
461 process weeks after transport and relocation, and probably should not be considered  
462 acclimated to their new facility. We reported similar effects in chimpanzees, rhesus and  
463 cynomolgus monkey's relocation to Texas [23, 24] . Their conclusion was that the  
464 chimpanzees, rhesus and cynomolgus monkeys should not serve as subjects in studies that  
465 use the measured parameters as dependent variables, until they have had adequate time to  
466 adjust to their new conditions. This required at least 6-8 weeks for the chimpanzees and  
467 longer for the monkeys in this study. The current data does not address the time interval  
468 between arrival and 150 days. Additional data is needed to fill in this 5-month gap in the  
469 monkey data.

470 This study focused on the effects of transportation and relocation as assessed by a variety of  
471 parameters that are also likely to be dependent measures in biomedical investigations.  
472 Significant changes as a function of transport may have few clinical implications in healthy  
473 animals, yet they may have numerous research implications. For example, changes in red  
474 blood cell counts in investigations of malaria [49] or changes in CD4+ counts in  
475 immunodeficiency virus investigations [50]. The better the effects of transport are  
476 understood, the better the refinements to management procedures can be. The development  
477 of more refined management techniques will result in enhanced welfare for the animals [24,  
478 51-54], enhanced abilities to directly test experimental hypotheses, and may ultimately result  
479 in important reductions in the number of primate subjects required to effectively test  
480 hypotheses.

481 Future studies will examine smaller-scale movements of squirrel monkeys within the various  
482 housing settings of the KCCMR. We have additional data [24, 55] from reasonably-sized  
483 samples of transported and relocated chimpanzees and cynomolgus monkeys that also  
484 demonstrate that transport and relocation result in statistically significant changes in a variety  
485 of hematological, clinical chemistry, and immunological parameters for these species,  
486 although the specific measures affected differ by species.

487 The data presented here crucial to guide researchers in determining an appropriate  
488 acclimation period for their study; however, there are additional factors researchers must  
489 consider that can influence how long it takes for acclimation to occur. These factors include  
490 the intensity and duration of stress, as well as the species, sex, age, genotype, health status,  
491 previous life experience, allometric differences, and even the time of year that acclimation  
492 occurs.

### 493 **Acknowledgement**

494 We thank Virginia Parks and Bethany Brock for providing blood samples for this study. This  
495 study is partly supported by the Cattleman for Cancer Research (PN) and the Squirrel  
496 Monkey Breeding and Research Resource (LW) at the Michale E Keeling Center for  
497 Comparative Medicine and Research at the MD Anderson Cancer Center.

498 **Author Contributions:** PN and LW designed, interpreted, and analyzed data. PN and BN  
499 performed the experiments. GW and SS provided additional interpretation.

500 **Conflicts of Interest:** The authors no conflict of interest.

501 Funding: P40-OD010938-40 (LW), and Cattleman for Cancer Research  
502 grant (PN, LW).

504 **References**

505

- 506 1. Elfenbein HA, Rosen RF, Stephens SL, Switzer RC, Smith Y, Pare J, et al. Cerebral beta-  
507 amyloid angiopathy in aged squirrel monkeys. *Histology and histopathology*. 2007;22(2):155-67.  
508 PubMed PMID: 17149688.
- 509 2. Heuer E, Jacobs J, Du R, Wang S, Keifer OP, Cintron AF, et al. Amyloid-Related Imaging  
510 Abnormalities in an Aged Squirrel Monkey with Cerebral Amyloid Angiopathy. *Journal of*  
511 *Alzheimer's disease : JAD*. 2017;57(2):519-30. doi: 10.3233/JAD-160981. PubMed PMID: 28269776.
- 512 3. Nehete PN, Williams LE, Chitta S, Nehete BP, Patel AG, Ramani MD, et al. Class C CpG  
513 Oligodeoxynucleotide Immunomodulatory Response in Aged Squirrel Monkey (*Saimiri Boliviensis*  
514 *Boliviensis*). *Front Aging Neurosci*. 2020;12:36. Epub 2020/03/21. doi: 10.3389/fnagi.2020.00036.  
515 PubMed PMID: 32194391; PubMed Central PMCID: PMCPCMC7063459.
- 516 4. Collins WE, Sullivan JS, Strobert E, Galland GG, Williams A, Nace D, et al. Studies on the  
517 Salvador I strain of *Plasmodium vivax* in non-human primates and anopheline mosquitoes. *Am J Trop*  
518 *Med Hyg*. 2009;80(2):228-35. Epub 2009/02/05. PubMed PMID: 19190218.
- 519 5. Riccio EKP, Pratt-Riccio LR, Bianco-Júnior C, Sanchez V, Totino PRR, Carvalho LJM, et al.  
520 Molecular and immunological tools for the evaluation of the cellular immune response in the  
521 neotropical monkey *Saimiri sciureus*, a non-human primate model for malaria research. *Malaria*  
522 *Journal*. 2015;14(1):166. doi: 10.1186/s12936-015-0688-1.
- 523 6. Tougan T, Aoshi T, Coban C, Katakai Y, Kai C, Yasutomi Y, et al. TLR9 adjuvants enhance  
524 immunogenicity and protective efficacy of the SE36/AHG malaria vaccine in nonhuman primate  
525 models. *Hum Vaccin Immunother*. 2013;9(2):283-90. Epub 2013/01/08. doi: 10.4161/hv.22950.  
526 PubMed PMID: 23291928; PubMed Central PMCID: PMCPCMC3859748.
- 527 7. LaBonte JA, Babcock GJ, Patel T, Sodroski J. Blockade of HIV-1 infection of New World  
528 monkey cells occurs primarily at the stage of virus entry. *J Exp Med*. 2002;196(4):431-45. doi:  
529 10.1084/jem.20020468. PubMed PMID: 12186836.
- 530 8. Williams L, Brown P, Ironside J, Gibson S, Will R, Ritchie D, et al. Clinical, neuropathological  
531 and immunohistochemical features of sporadic and variant forms of Creutzfeldt-Jakob disease in the  
532 squirrel monkey (*Saimiri sciureus*). *J Gen Virol*. 2007;88(Pt 2):688-95. Epub 2007/01/26. doi:  
533 10.1099/vir.0.81957-0. PubMed PMID: 17251588.
- 534 9. Ritchie DL, Gibson SV, Abee CR, Kreil TR, Ironside JW, Brown P. Blood transmission studies  
535 of prion infectivity in the squirrel monkey (*Saimiri sciureus*): the Baxter study. *Transfusion*.  
536 2016;56(3):712-21. Epub 2015/11/26. doi: 10.1111/trf.13422. PubMed PMID: 26594017.
- 537 10. Nehete PN, Wilkerson G, Nehete BP, Chitta S, Ruiz JC, Scholtzova H, et al. Cellular immune  
538 responses in peripheral blood lymphocytes of *Giardia* infected squirrel monkey (*Saimiri boliviensis*  
539 *boliviensis*) treated with Fenbendazole. *PLOS ONE*. 2018;13(11):e0198497. doi:  
540 10.1371/journal.pone.0198497.
- 541 11. Capitano JP, Lerche NW. Social separation, housing relocation, and survival in simian AIDS:  
542 a retrospective analysis. *Psychosomatic medicine*. 1998;60(3):235-44. doi: 10.1097/00006842-  
543 199805000-00001. PubMed PMID: 9625208.
- 544 12. Champagne AB, Gunstone RF, Klopfer LE, West LHT, Pines AL. *Cognitive Structure and*  
545 *Conceptual Change*1985. null p.
- 546 13. Crockett CM, Bowers CL, Sackett GP, Bowden DM. Urinary cortisol responses of longtailed  
547 macaques to five cage sizes, tethering, sedation, and room change. *Am J Primatol*. 1993;30(1):55-74.  
548 Epub 1993/01/01. doi: 10.1002/ajp.1350300105. PubMed PMID: 31941178.
- 549 14. Crockett CM, Shimoji M, Bowden DM. Behavior, appetite, and urinary cortisol responses by  
550 adult female pigtailed macaques to cage size, cage level, room change, and ketamine sedation. *Am J*  
551 *Primatol*. 2000;52(2):63-80. Epub 2000/10/29. doi: 10.1002/1098-2345(200010)52:2<63::Aid-  
552 ajp1>3.0.Co;2-k. PubMed PMID: 11051442.



- 553 15. Dalin AM, Magnusson U, Häggendal J, Nyberg L. The effect of transport stress on plasma  
554 levels of catecholamines, cortisol, corticosteroid-binding globulin, blood cell count, and lymphocyte  
555 proliferation in pigs. *Acta Vet Scand.* 1993;34(1):59-68. Epub 1993/01/01. PubMed PMID: 8342466.
- 556 16. Neal Webb SJ, Hau J, Schapiro SJ. Relationships between captive chimpanzee (*Pan*  
557 *troglodytes*) welfare and voluntary participation in behavioural studies. *Applied Animal Behaviour*  
558 *Science.* 2019;214:102-9. doi: <https://doi.org/10.1016/j.applanim.2019.03.002>.
- 559 17. Crockett CM, Bowers CL, Shimoji M, Leu M, Bowden DM, Sackett GP. Behavioral responses  
560 of longtailed macaques to different cage sizes and common laboratory experiences. *J Comp Psychol.*  
561 1995;109(4):368-83. Epub 1995/12/01. doi: 10.1037/0735-7036.109.4.368. PubMed PMID: 7497695.
- 562 18. Worlein JM, Kroeker R, Lee GH, Thom JP, Bellanca RU, Crockett CM. Socialization in  
563 pigtailed macaques (*Macaca nemestrina*). *Am J Primatol.* 2017;79(1):1-12. Epub 2016/04/26. doi:  
564 10.1002/ajp.22556. PubMed PMID: 27109591; PubMed Central PMCID: PMC5994344.
- 565 19. Golub MS, Hogrefe CE, Germann SL, Capitanio JP, Lozoff B. Behavioral consequences of  
566 developmental iron deficiency in infant rhesus monkeys. *Neurotoxicology and Teratology.*  
567 2006;28(1):3-17. doi: <https://doi.org/10.1016/j.ntt.2005.10.005>.
- 568 20. Capitanio JP, Kyes RC, Fairbanks LA. Considerations in the selection and conditioning of Old  
569 World monkeys for laboratory research: animals from domestic sources. *Ilar j.* 2006;47(4):294-306.  
570 Epub 2006/09/12. doi: 10.1093/ilar.47.4.294. PubMed PMID: 16963810.
- 571 21. Obernier JA, Baldwin RL. Establishing an appropriate period of acclimatization following  
572 transportation of laboratory animals. *Ilar j.* 2006;47(4):364-9. Epub 2006/09/12. doi:  
573 10.1093/ilar.47.4.364. PubMed PMID: 16963816.
- 574 22. Nehete PN, Shelton KA, Nehete BP, Chitta S, Williams LE, Schapiro SJ, et al. Effects of  
575 transportation, relocation, and acclimation on phenotypes and functional characteristics of peripheral  
576 blood lymphocytes in rhesus monkeys (*Macaca mulatta*). *PloS one.* 2017;12(12):e0188694-e. doi:  
577 10.1371/journal.pone.0188694. PubMed PMID: 29261698.
- 578 23. Shelton KA, Nehete BP, Chitta S, Williams LE, Schapiro SJ, Simmons J, et al. Effects of  
579 Transportation and Relocation on Immunologic Measures in *Cynomolgus* Macaques (*Macaca*  
580 *fascicularis*). *J Am Assoc Lab Anim Sci.* 2019;58(6):774-82. Epub 2019/10/13. doi: 10.30802/aalas-  
581 jaalas-19-000007. PubMed PMID: 31604484; PubMed Central PMCID: PMC6926399.
- 582 24. Schapiro SJ, Lambeth SP, Jacobsen KR, Williams LE, Nehete BN, Nehete PN. Physiological  
583 and Welfare Consequences of Transport, Relocation, and Acclimatization of Chimpanzees (*Pan*  
584 *troglodytes*). *Appl Anim Behav Sci.* 2012;137(3-4):183-93. Epub 2012/07/10. doi:  
585 10.1016/j.applanim.2011.11.004. PubMed PMID: 22773870; PubMed Central PMCID:  
586 PMC3388538.
- 587 25. Laboratory animal welfare: Public Health Service policy on humane care and use of laboratory  
588 animals by awardee institutions; notice. *Federal register.* 1985;50(90):19584-5. Epub 1985/05/09.  
589 PubMed PMID: 11655780.
- 590 26. Nehete P, Hanley P, Nehete B, Yang G, Ruiz J, Williams L, et al. Phenotypic and Functional  
591 Characterization of Lymphocytes from Different Age Groups of Bolivian Squirrel Monkeys (*Saimiri*  
592 *boliviensis boliviensis*). *PloS one.* 2013;8:e79836. doi: 10.1371/journal.pone.0079836.
- 593 27. Nehete PN, Shelton KA, Nehete BP, Chitta S, Williams LE, Schapiro SJ, et al. Effects of  
594 transportation, relocation, and acclimation on phenotypes and functional characteristics of peripheral  
595 blood lymphocytes in rhesus monkeys (*Macaca mulatta*). *PLoS One.* 2017;12(12):e0188694. Epub  
596 2017/12/21. doi: 10.1371/journal.pone.0188694. PubMed PMID: 29261698; PubMed Central PMCID:  
597 PMC5736198.
- 598 28. Nehete PN, Williams LE, Chitta S, Nehete BP, Patel AG, Ramani MD, et al. Class C CpG  
599 Oligodeoxynucleotide Immunomodulatory Response in Aged Squirrel Monkey (*Saimiri Boliviensis*  
600 *Boliviensis*). *Frontiers in Aging Neuroscience.* 2020;12(36). doi: 10.3389/fnagi.2020.00036.

- 601 29. Nehete PN, Murthy KK, Satterfield WC, Arlinghaus RB, Sastry KJ. Studies on V3-specific  
602 cross-reactive T-cell responses in chimpanzees chronically infected with HIV-1III<sub>B</sub>. *AIDS*. 1995;9(6).
- 603 30. Oka T, Sastry KJ, Nehete P, Schapiro SJ, Guo JQ, Talpaz M, et al. Evidence for specific  
604 immune response against P210 BCR-ABL in long-term remission CML patients treated with  
605 interferon. *Leukemia*. 1998;12(2):155-63. Epub 1998/03/31. doi: 10.1038/sj.leu.2400919. PubMed  
606 PMID: 9519777.
- 607 31. Nehete PN, Chitta S, Hossain MM, Hill L, Bernacky BJ, Baze W, et al. Protection against  
608 chronic infection and AIDS by an HIV envelope peptide-cocktail vaccine in a pathogenic SHIV-rhesus  
609 model. *Vaccine*. 2001;20(5-6):813-25. Epub 2001/12/12. doi: 10.1016/s0264-410x(01)00408-x.  
610 PubMed PMID: 11738745.
- 611 32. Nehete PN GR, Nehete B, Sastry KJ. Dendritic cells enhance detection of antigen-specific  
612 cellular immune responses by lymphocytes from rhesus macaques immunized with an HIV envelope  
613 peptide cocktail vaccine. *Jr Medical Primatology*. 2003;In Press.
- 614 33. Nehete PN, Lewis DE, Tang DN, Pollack MS, Sastry KJ. Presence of HLA-C-restricted  
615 cytotoxic T-lymphocyte responses in long-term nonprogressors infected with human  
616 immunodeficiency virus. *Viral Immunol*. 1998;11(3):119-29. Epub 1999/01/26. doi:  
617 10.1089/vim.1998.11.119. PubMed PMID: 9918403.
- 618 34. Heraud JM, Merien F, Mortreux F, Mahieux R, Kazanji M. Immunological changes and  
619 cytokine gene expression during primary infection with human T-cell leukaemia virus type 1 in  
620 squirrel monkeys (*Saimiri sciureus*). *Virology*. 2007;361(2):402-11. Epub 2007/01/16. doi:  
621 10.1016/j.virol.2006.11.028. PubMed PMID: 17223152.
- 622 35. Heraud J-M, Lavergne A, Kazanji M. Molecular cloning, characterization, and quantification of  
623 squirrel monkey (*Saimiri sciureus*) Th1 and Th2 cytokines. *Immunogenetics*. 2002;54:20-9. doi:  
624 10.1007/s00251-002-0443-y.
- 625 36. Nehete P, Magden ER, Nehete B, Hanley PW, Abee CR. Obesity related alterations in plasma  
626 cytokines and metabolic hormones in chimpanzees. *International Journal of Inflammation*. 2014;2014.
- 627 37. Nehete PN, Nehete BP, Chitta S, Williams LE, Abee CR. Phenotypic and Functional  
628 Characterization of Peripheral Blood Lymphocytes from Various Age- and Sex-Specific Groups of  
629 Owl Monkeys (*Aotus nancymae*). *Comp Med*. 2017;67(1):67-78. PubMed PMID: 28222841.
- 630 38. Bergeron R, Scott SL, Emond J-P, Mercier F, Cook NJ, Schaefer AL. Physiology and behavior  
631 of dogs during air transport. *Can J Vet Res*. 2002;66(3):211-6. PubMed PMID: 12146895.
- 632 39. Fazio E, Medica P, Alberghina D, Cavaleri S, Ferlazzo A. Effect of long-distance road  
633 transport on thyroid and adrenal function and haematocrit values in Limousin cattle: influence of body  
634 weight decrease. *Vet Res Commun*. 2005;29(8):713-9. Epub 2005/12/22. doi: 10.1007/s11259-005-  
635 3866-8. PubMed PMID: 16369885.
- 636 40. McGlone JJ, Salak JL, Lumpkin EA, Nicholson RI, Gibson M, Norman RL. Shipping stress  
637 and social status effects on pig performance, plasma cortisol, natural killer cell activity, and leukocyte  
638 numbers. *J Anim Sci*. 1993;71(4):888-96. Epub 1993/04/01. doi: 10.2527/1993.714888x. PubMed  
639 PMID: 8478291.
- 640 41. Watson SL, McCoy JG, Stavisky RC, Greer TF, Hanbury D. Cortisol response to relocation  
641 stress in Garnett's bushbaby (*Otolemur garnettii*). *Contemp Top Lab Anim Sci*. 2005;44(3):22-4. Epub  
642 2005/06/07. PubMed PMID: 15934719.
- 643 42. Davenport MD, Lutz CK, Tiefenbacher S, Novak MA, Meyer JS. A rhesus monkey model of  
644 self-injury: effects of relocation stress on behavior and neuroendocrine function. *Biol Psychiatry*.  
645 2008;63(10):990-6. Epub 2008/01/01. doi: 10.1016/j.biopsych.2007.10.025. PubMed PMID:  
646 18164279; PubMed Central PMCID: PMCPMC2486411.
- 647 43. Fernström AL, Sutian W, Royo F, Fernström AL, Sutian W, Royo F, et al. Stress in  
648 cynomolgus monkeys (*Macaca fascicularis*) subjected to long-distance transport and simulated  
649 transport housing conditions. *Stress*. 2008;11(6):467-76. doi: 10.1080/10253890801903359.



- 650 44. Honess PE, Johnson PJ, Wolfensohn SE. A study of behavioural responses of non-human  
651 primates to air transport and re-housing. *Lab Anim.* 2004;38(2):119-32. Epub 2004/04/09. doi:  
652 10.1258/002367704322968795. PubMed PMID: 15070451.
- 653 45. Kim CY, Han JS, Suzuki T, Han SS. Indirect indicator of transport stress in hematological  
654 values in newly acquired cynomolgus monkeys. *J Med Primatol.* 2005;34(4):188-92. Epub 2005/08/02.  
655 doi: 10.1111/j.1600-0684.2005.00116.x. PubMed PMID: 16053496.
- 656 46. Kagira JM, Ngotho M, Thuita JK, Maina NW, Hau J. Hematological changes in vervet  
657 monkeys (*Chlorocebus aethiops*) during eight months' adaptation to captivity. *Am J Primat.*  
658 2007;69(9):1053-63.
- 659 47. van Ruiven R, Meijer G, Wiersma A, Baumans V, van Zutphen L, Ritskes-Hoitinga R. The  
660 influence of transportation stress on selected nutritional parameters to establish the necessary minimum  
661 period for adaptation in rat feeding studies. *Lab Animal.* 1998;32:446-56.
- 662 48. Van Scott MR, Reece SP, Olmstead S, Wardle R, Rosenbaum MD. Effects of acute  
663 psychosocial stress in a nonhuman primate model of allergic asthma. *Journal of the American*  
664 *Association for Laboratory Animal Science : JAALAS.* 2013;52(2):157-64. PubMed PMID:  
665 23562098.
- 666 49. Barasa M, Gicheru MM, Kagasi EA, Hastings OS. Characterisation of placental malaria in  
667 olive baboons (*Papio anubis*) infected with *Plasmodium knowlesi* H strain. *International Journal of*  
668 *Integrative Biology.* 2010;9(2):54-8.
- 669 50. The Primate Immune System. A Companion to Anthropological Genetics. p. 309-26.
- 670 51. Laule G, Whittaker M. Enhancing nonhuman primate care and welfare through the use of  
671 positive reinforcement training. *J Appl Anim Welf Sci.* 2007;10(1):31-8. Epub 2007/05/09. doi:  
672 10.1080/10888700701277311. PubMed PMID: 17484676.
- 673 52. Schaffner CM, Smith TE. Familiarity may buffer the adverse effects of relocation on  
674 marmosets (*Callithrix kuhlii*): Preliminary evidence. *Zoo Biology.* 2005;24(1):93-100. doi:  
675 10.1002/zoo.20019.
- 676 53. Schapiro S, Lambeth S, Thiele E, Rousset O. The effects of behavioral management programs  
677 on dependent measures in biomedical research. *American Journal of Primatology.* 2007;69.
- 678 54. Veeder CL, Bloomsmith MA, McMillan JL, Perlman JE, Martin AL. Positive reinforcement  
679 training to enhance the voluntary movement of group-housed sooty mangabeys (*Cercocebus atys atys*).  
680 *J Am Assoc Lab Anim Sci.* 2009;48(2):192-5. Epub 2009/04/23. PubMed PMID: 19383217; PubMed  
681 Central PMCID: PMCPMC2679662.
- 682 55. Cinque C, De Marco A, Mairesse J, Giuli C, Sanna A, De Marco L, et al. Relocation stress  
683 induces short-term fecal cortisol increase in Tonkean macaques (*Macaca tonkeana*). *Primates; journal*  
684 *of primatology.* 2017;58(2):315-21. doi: 10.1007/s10329-016-0590-7. PubMed PMID: 27904967.

## 685 686 **FIGURE LEGENDS**

687

688 **Fig 1 (A). Gating scheme for phenotype analyses of the various cell markers in the peripheral**  
689 **blood from a representative squirrel monkey.** The lymphocytes were first gated based on forward  
690 scatter (FCS) versus side scatter (SSC), and then CD3<sup>+</sup>, CD4<sup>+</sup>, CD8<sup>+</sup>, CD4<sup>+</sup>CD8<sup>+</sup>, and CD20<sup>+</sup> cells,  
691 and NK and NKT cells, were positively identified from the lymphocyte subset. The specificity of  
692 staining for the various markers was ascertained according to the isotype control antibody staining  
693 used for each pair of combination markers, as shown.

694 **Figure 1 (B). Relocation-dependent differences in lymphocytes in squirrel monkeys.**

695 Aliquots of EDTA whole blood were stained with fluorescence-labeled antibodies to the CD3<sup>+</sup>, CD4<sup>+</sup>,  
696 CD8<sup>+</sup>, and CD20<sup>+</sup> to identify lymphocyte subpopulations Pre- and Day 1 and 150 post-transportation  
697 and relocation. Values on the Y-axis are absolute lymphocyte cells. P values were considered  
698 statistically significant at  $p < 0.05$ . *Symbol: \*  $p < 0.05$ ; \*\*  $p < 0.01$ ; \*\*\*  $p < 0.0001$ .*

699 **Figure 2 (A). Proliferative response of PBMCs to mitogens.** PBMCs that are isolated from blood  
700 samples of the squirrel monkeys were used for determining proliferative response to different  
701 mitogens, using the standard [3H] thymidine incorporation assay. The proliferation responses are  
702 expressed as Stimulation Index (SI) after blank (i.e., medium only) subtraction. P values were  
703 considered statistically significant at  $p < 0.05$ . *Symbol: \*  $p < 0.05$ ; \*\*  $p < 0.01$ ; \*\*\*  $p < 0.0001$ .*

704 **Figure 2 (B). IFN- $\gamma$  ELISPOT response to mitogens.** In duplicate wells of the 96-well microtiter  
705 plates, pre-coated with IFN- $\gamma$  antibody, were seeded with  $10^5$  PBMCs from squirrel monkeys  
706 stimulated with 1  $\mu$ g of each of the mitogens for 36 h at 37°C, and then washed and stained with  
707 biotinylated second IFN- $\gamma$  antibody. The total number of spots forming cells (SFCs) in each of the  
708 mitogen-stimulated wells was counted and adjusted to control medium as background. See the  
709 Methods section for experiment details. P values were considered statistically significant at  $p < 0.05$ .  
710 *Symbol: \*  $p < 0.05$ ; \*\*  $p < 0.01$ ; \*\*\*  $p < 0.0001$ .*

711 **Figure 3 (A). IFN- $\alpha$  ELISA response to mitogens.** In triplicate wells of the 96-well filter plate, PBMC  
712 cultures were stimulated with 1  $\mu$ g/mL mitogens for 36hr at 37°C and supernatant was collected to  
713 measure IFN- $\alpha$  by ELISA. The minimum detectable concentration in pg/mL for IFN $\alpha$  (2.9) was used  
714 for considering positive responses. P values were considered statistically significant at  $p < 0.05$ .  
715 *Symbol: \*  $p < 0.05$ ; \*\*  $p < 0.01$ ; \*\*\*  $p < 0.0001$ .*

716 **Figure 3 (B). Relocation-dependent differences in natural killer activity.** The NK activity of PBMC  
717 isolated from squirrel monkeys' blood was determined by co-culturing with <sup>51</sup>Cr-labeled K562 target  
718 cells at different effector to target cell ratios in culture medium. The percentage (%) of specific lysis is

719 shown at different effector to target ratios. P values  $p < 0.05$  were considered statistically significant.

720 *Symbol: \*  $p < 0.05$ ; \*\* $p < 0.01$ ; \*\*\*  $p < 0.0001$ .*

721 **Figure 4. Relocation-dependent differences in Cytokine.** In duplicate wells of the 96-well filter  
722 plate, 25  $\mu\text{L}$  of cell supernatant was incubated with 25  $\mu\text{L}$  of cytokine coupled beads overnight at 4°C,  
723 followed by washing and staining with biotinylated detection antibody. The plates were read on Biorad  
724 200 with use of Luminex technology, and the results are expressed as pg/mL concentration. The  
725 minimum detectable concentrations in pg/mL for IL-2 (0.7), IL-4 (2.7), IL-6 (0.3), IL-10 (6.2), IL-  
726 12(P40) (1.2), IFN- $\gamma$  (2.2), and TNF- $\alpha$  (2.1) were used for considering positive responses. See the  
727 Methods section for experimental details. P values were considered statistically significant at  $p < 0.05$ .

728 *Symbol: \*  $p < 0.05$ ; \*\* $p < 0.01$ ; \*\*\*  $p < 0.0001$ .*

729 **Figure 5A-5E. Relocation-dependent differences in Hematology (5A and 5B) and blood**  
730 **Chemistry (5C, D, E).** Whole blood by using an automated analyzer Advia (Siemens Healthcare  
731 Diagnostics, Tarrytown, NY). Values on the Y-axis are the absolute numbers of lymphocytes and  
732 monocytes presented as  $10^3$  per  $\mu\text{L}$  of whole blood. P values were considered statistically significant  
733 at  $p < 0.05$ . *Symbol: \*  $p < 0.05$ ; \*\* $p < 0.01$ ; \*\*\*  $p < 0.0001$ .*

734

735

Fig 1A

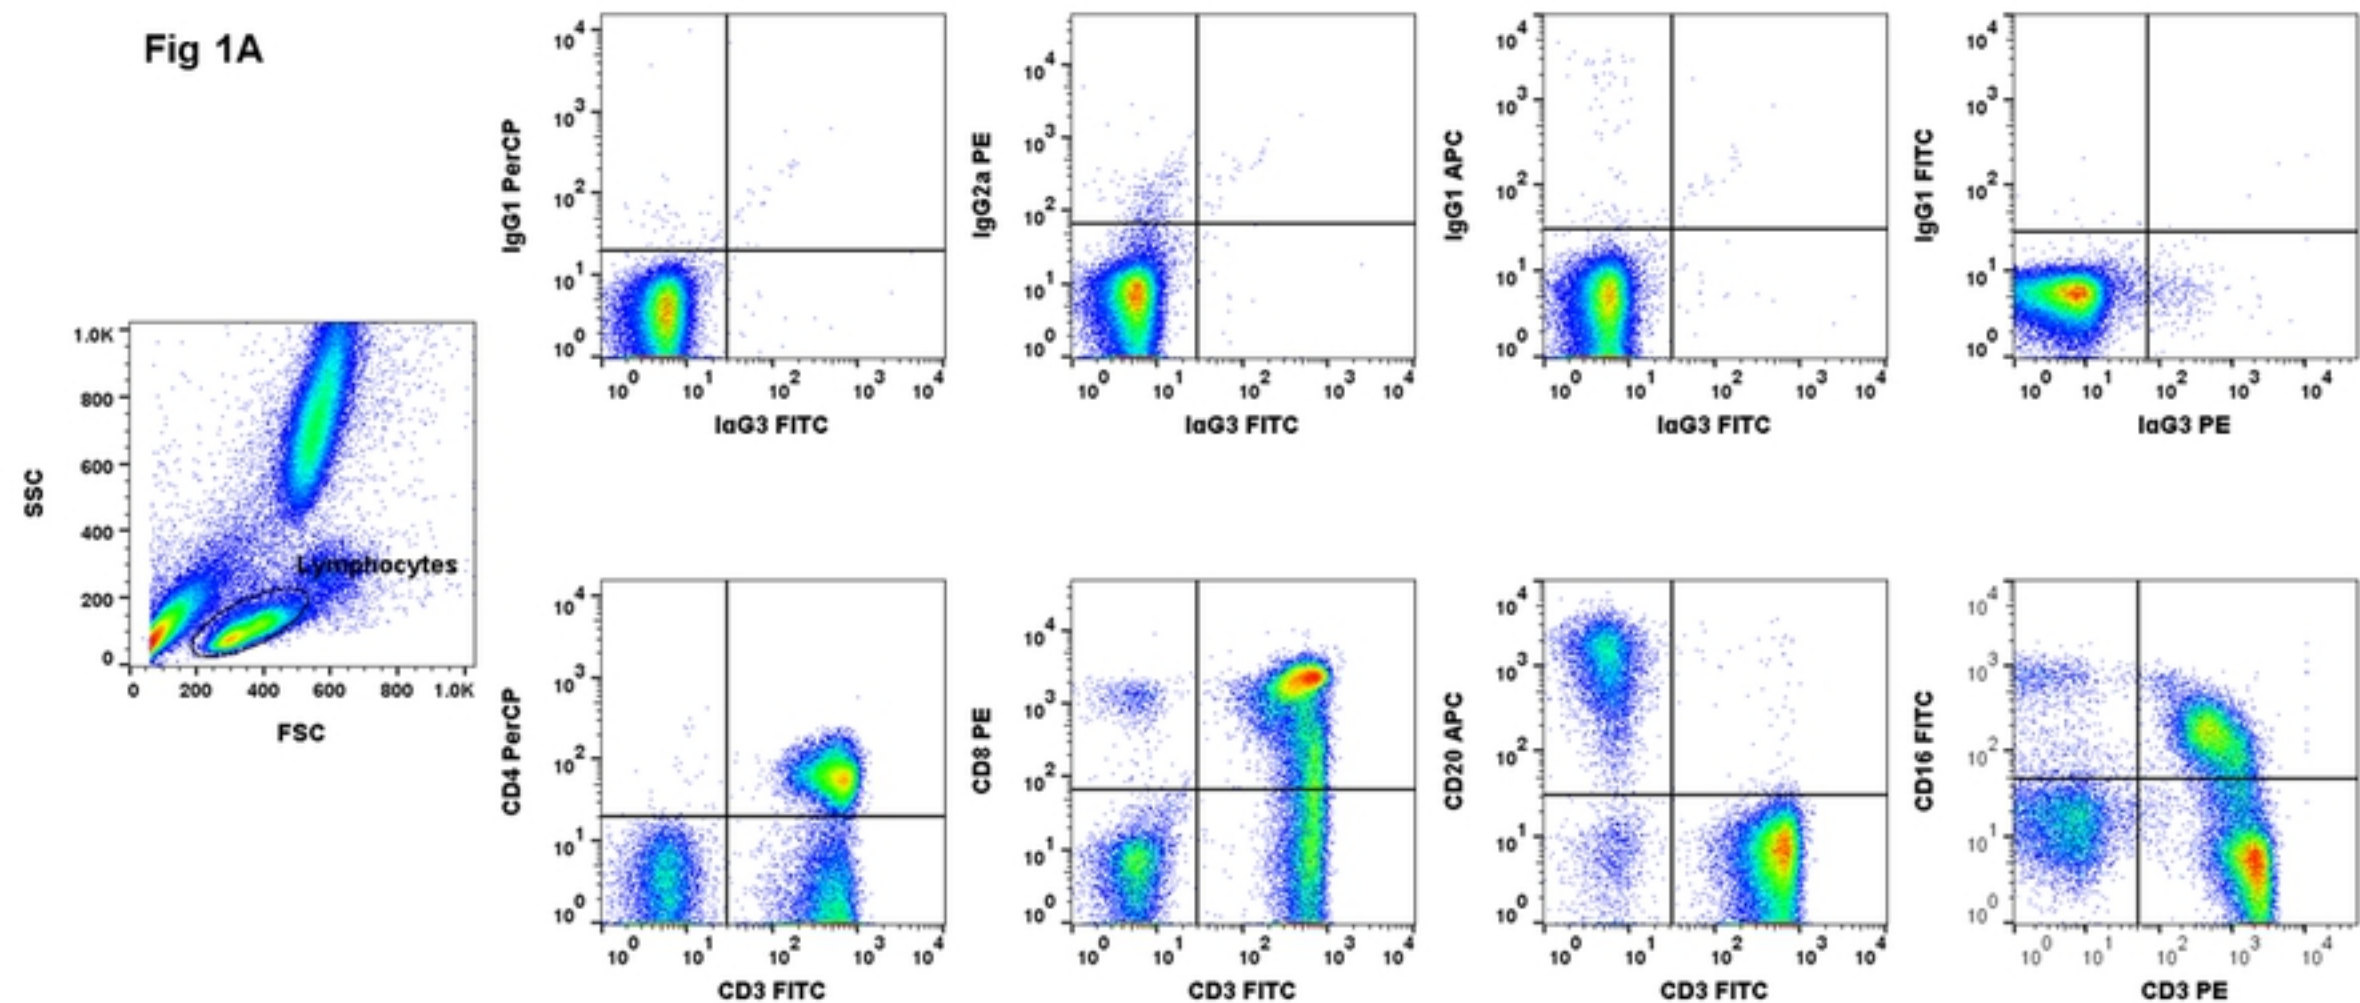

Fig 1B

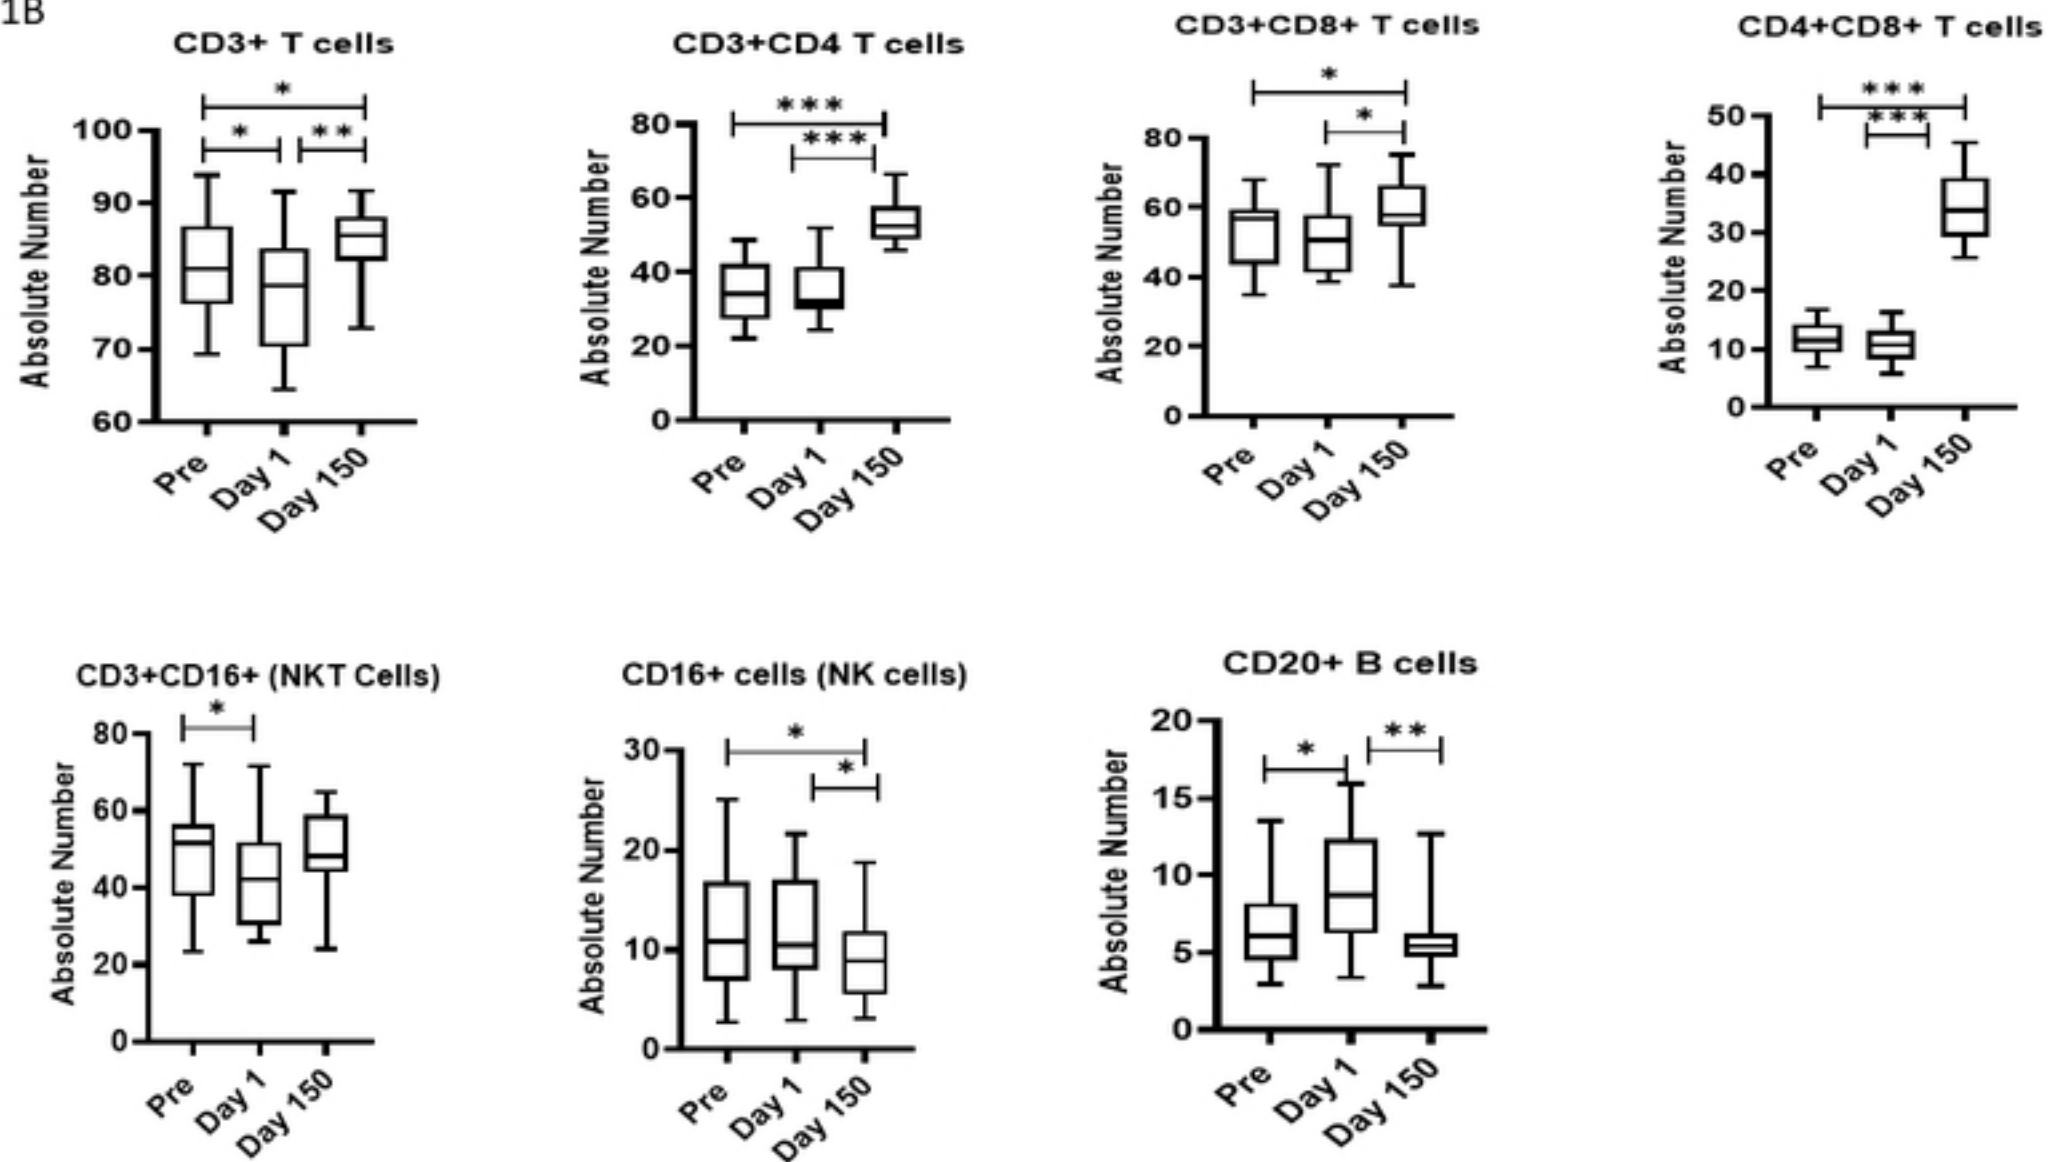

Fig 2A

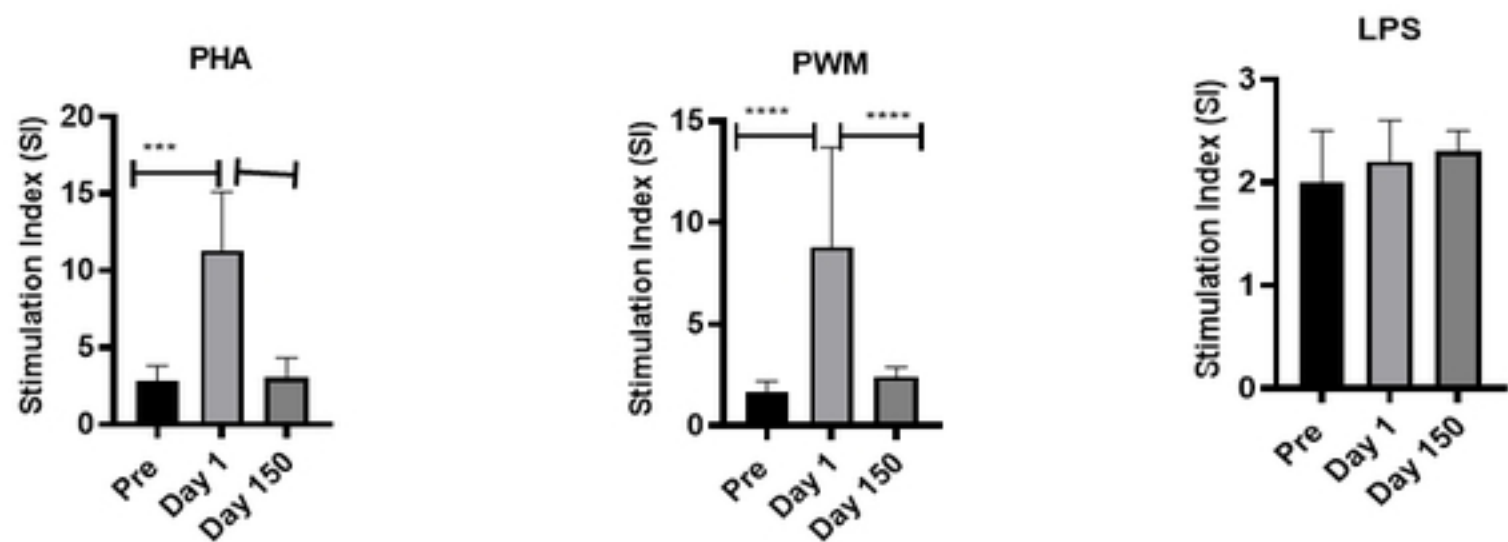

Fig 2B

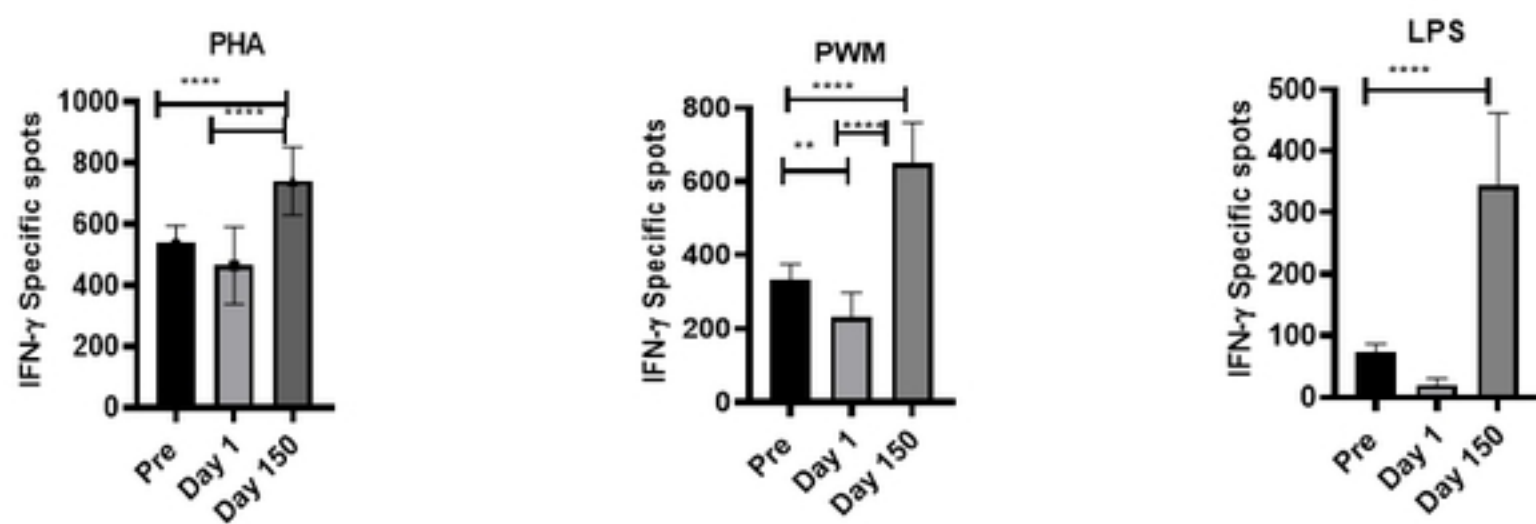

Fig 3A

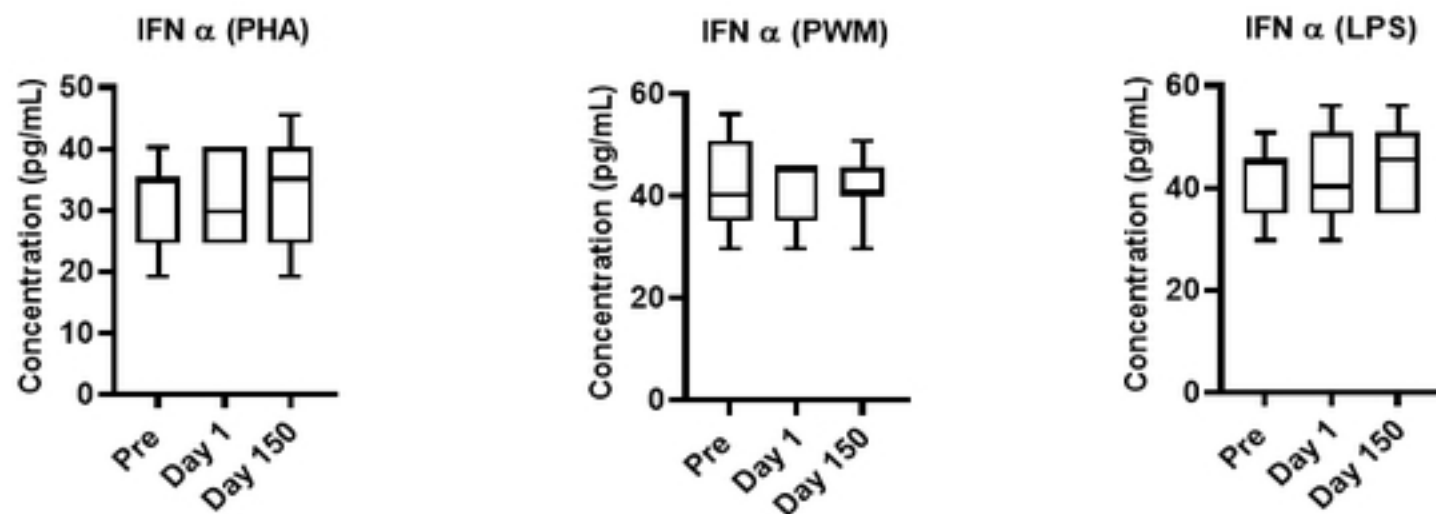

Fig 3B

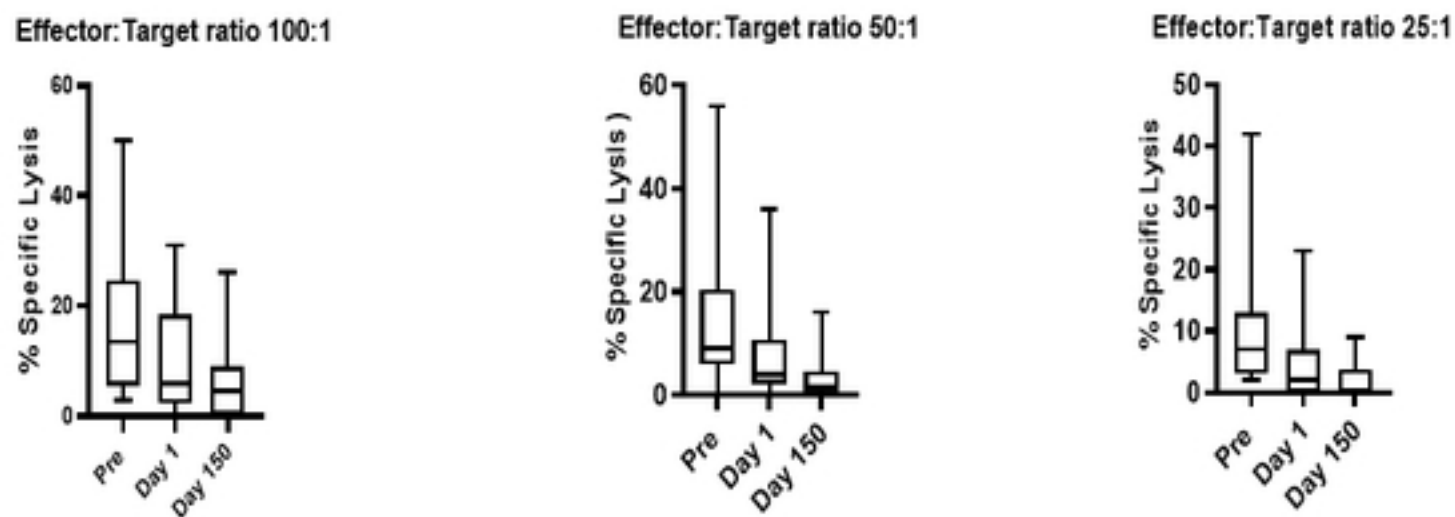

Fig 4A

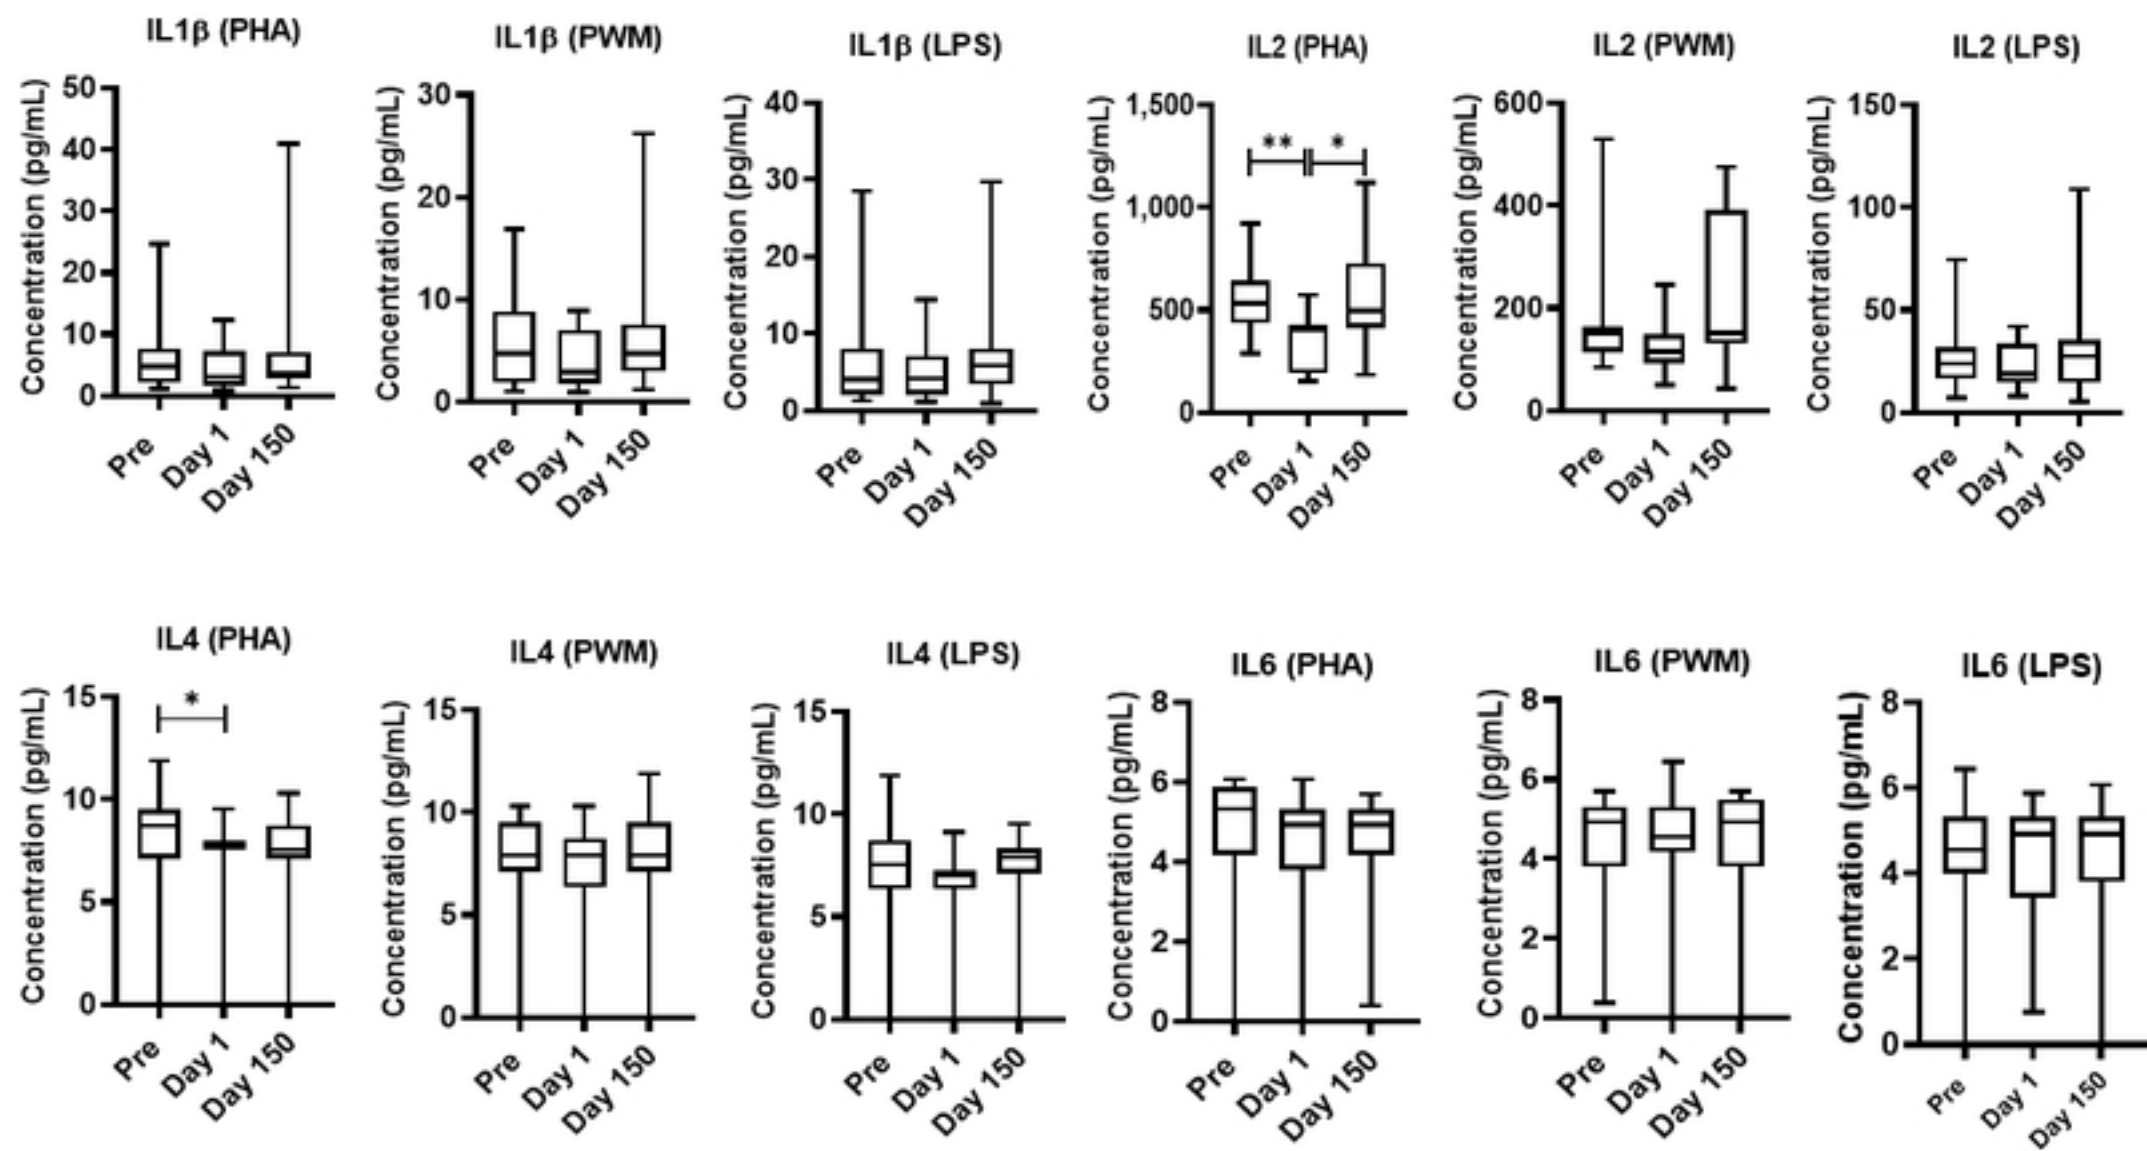



Fig 4B

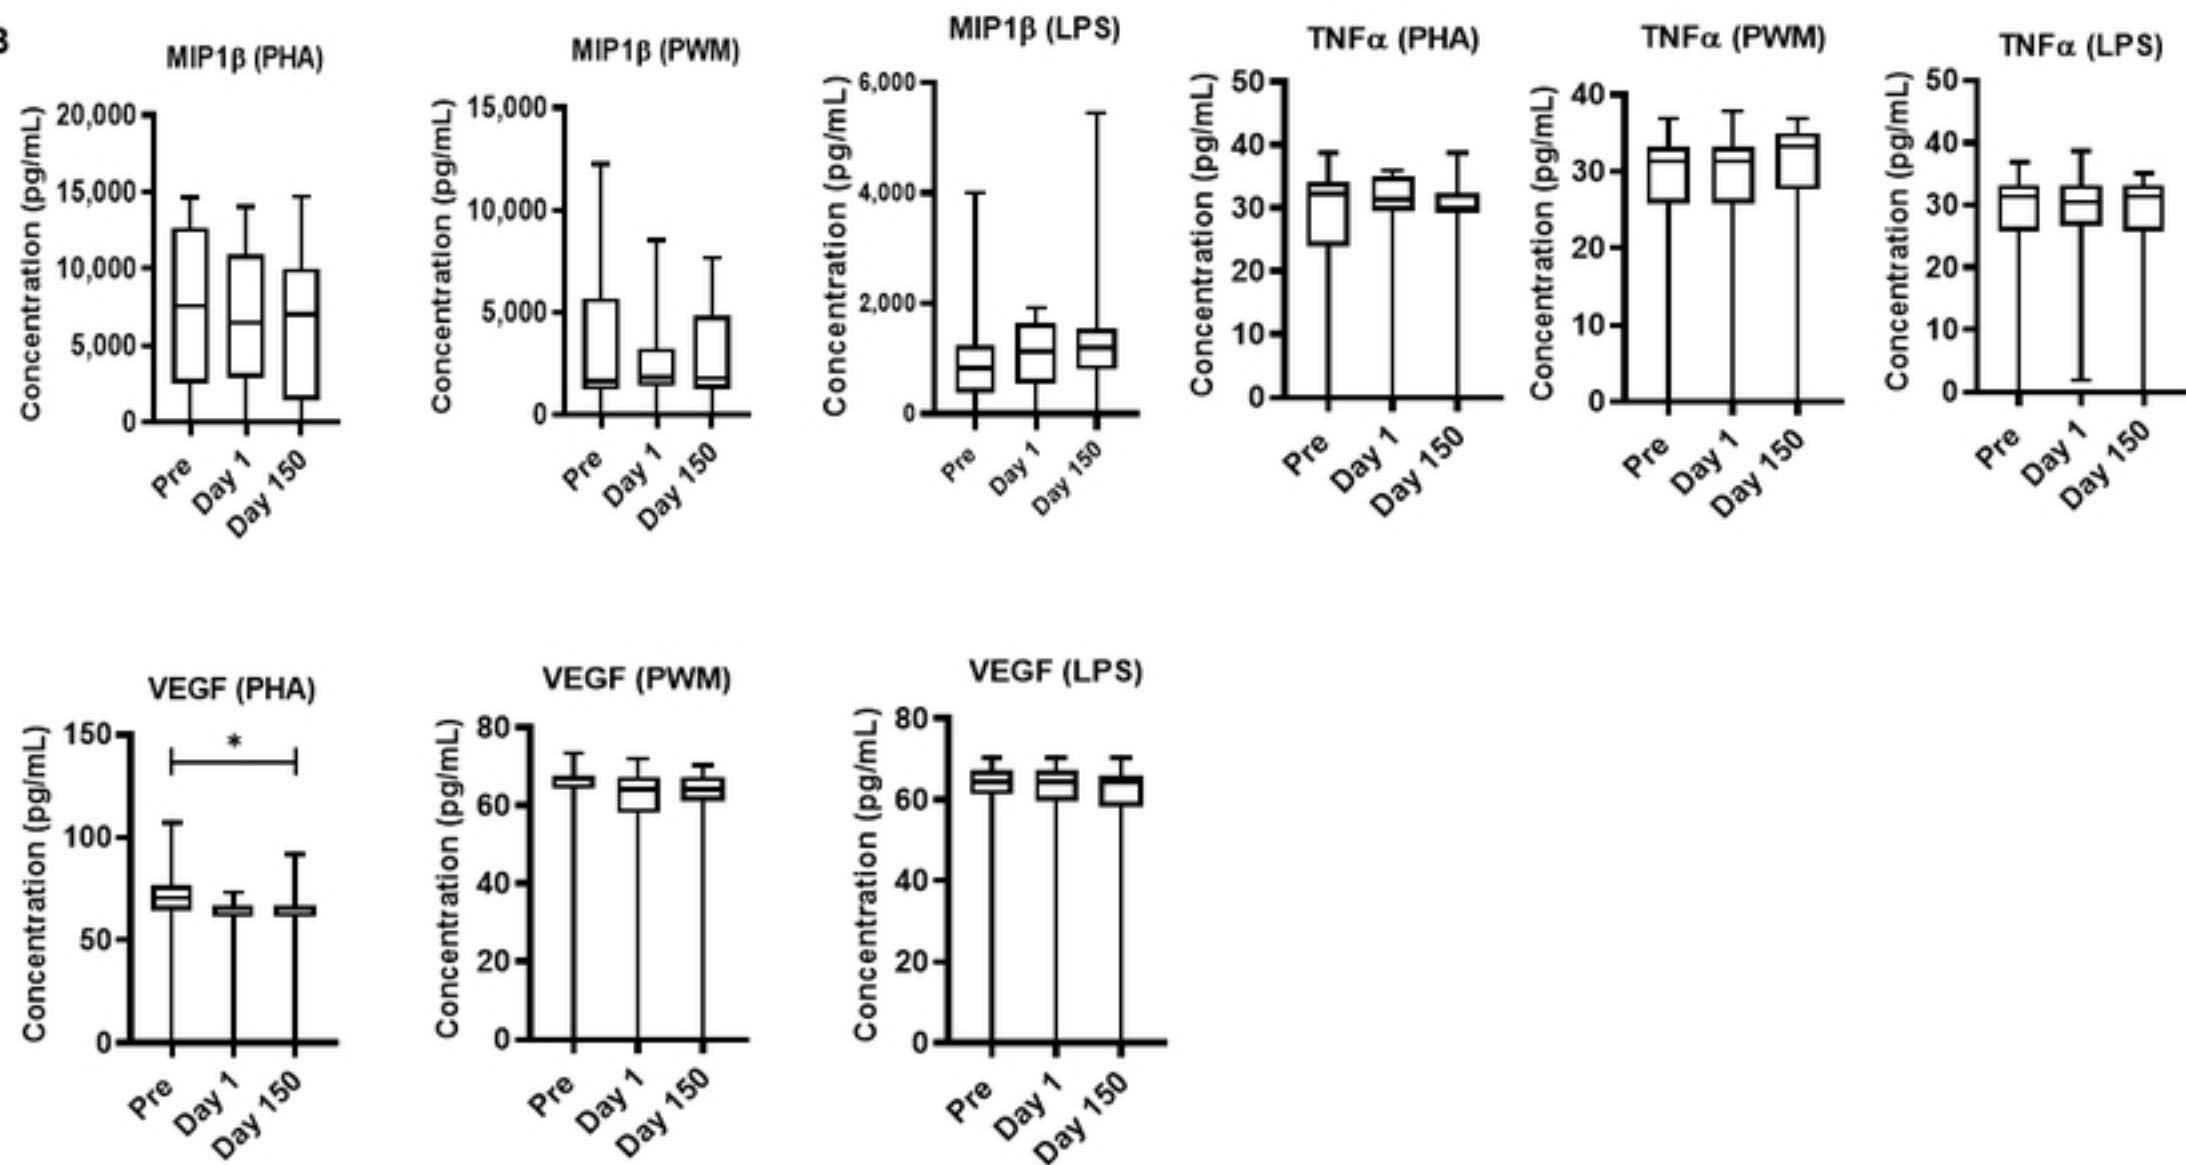

Fig 5A

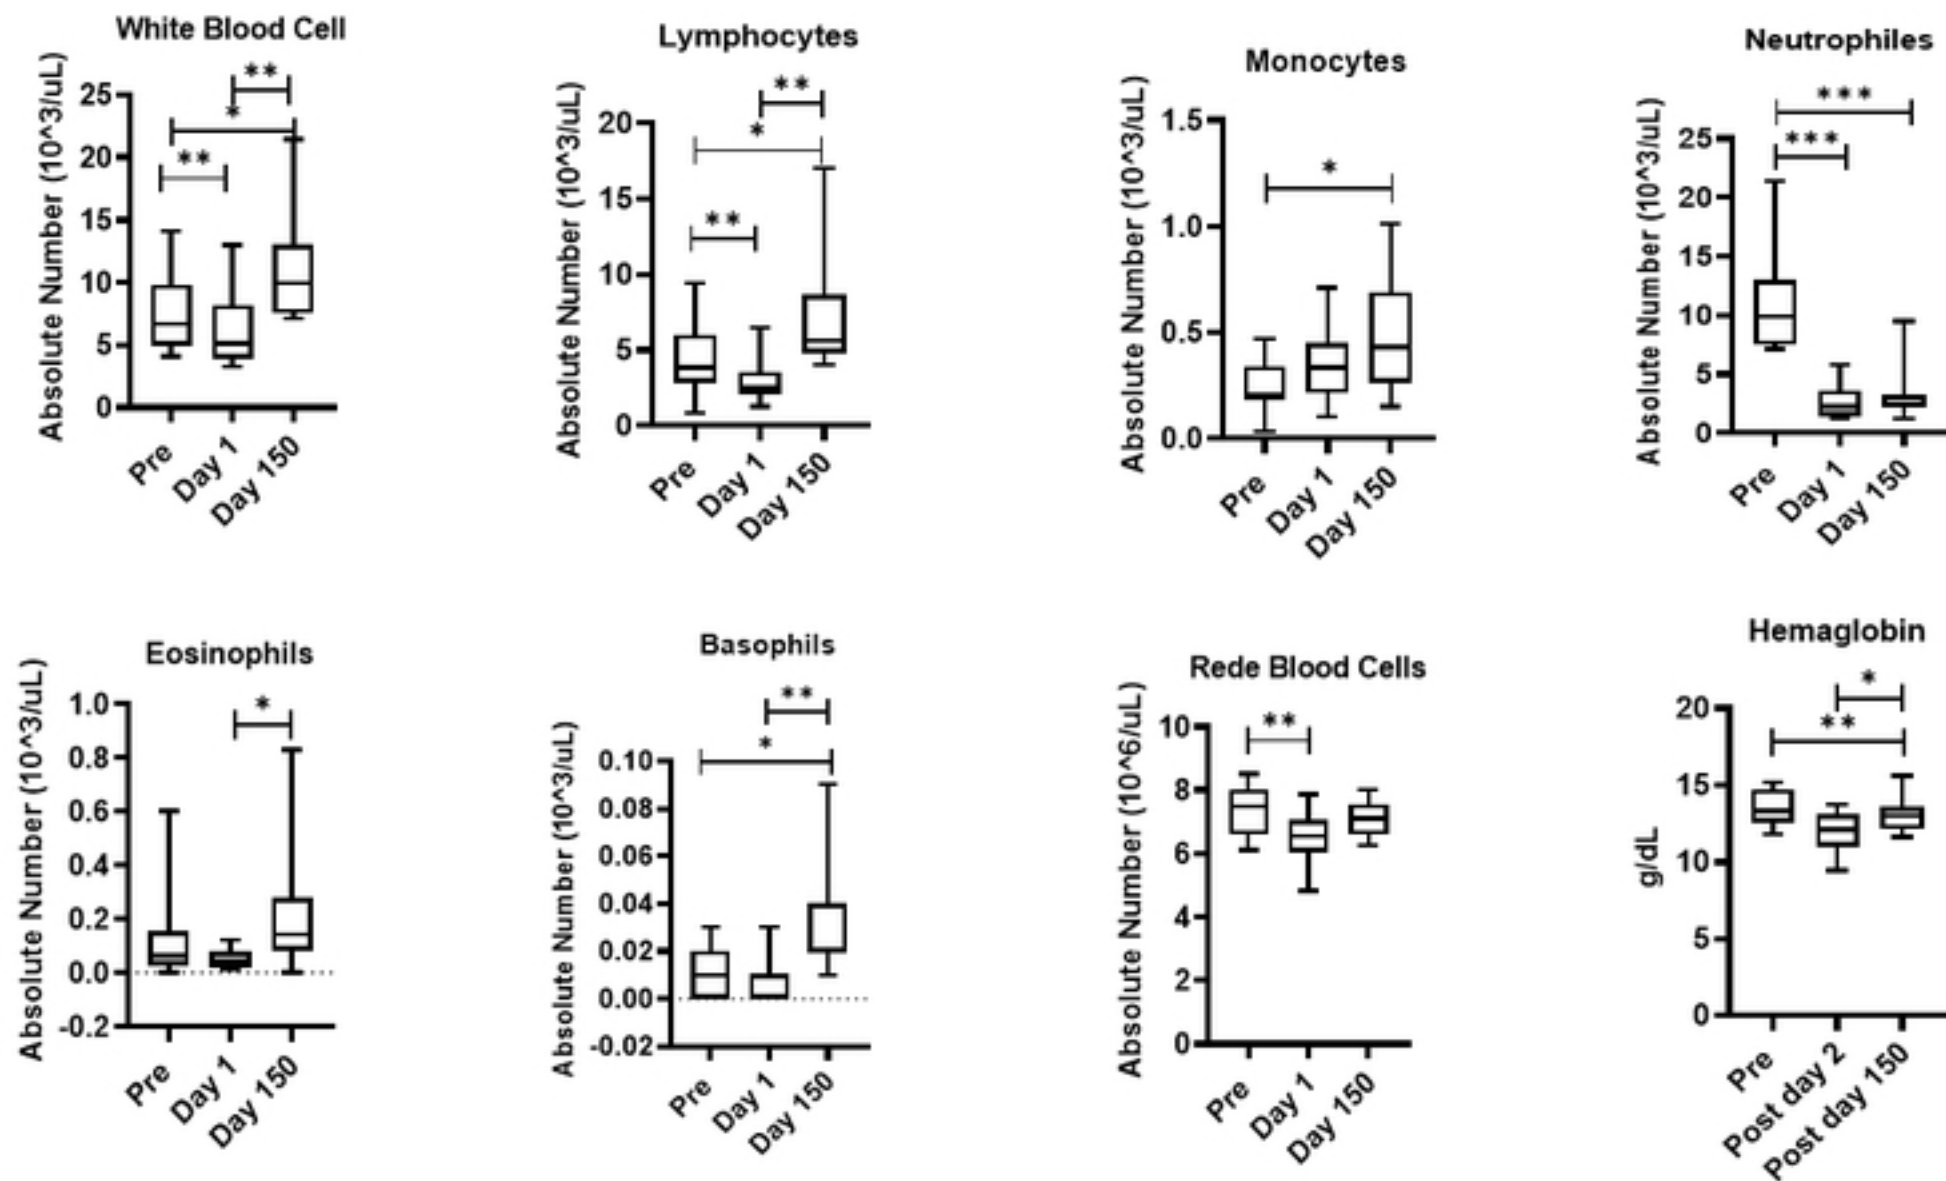

Fig 5B

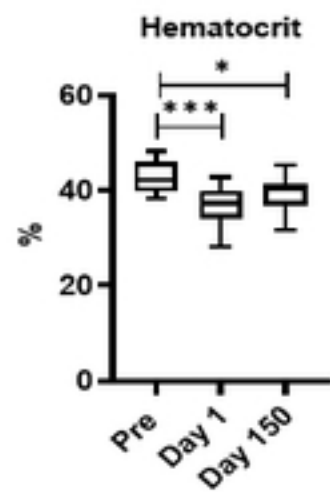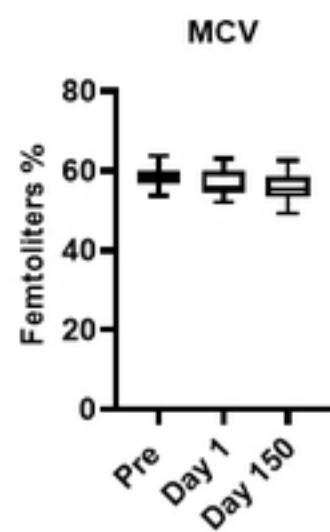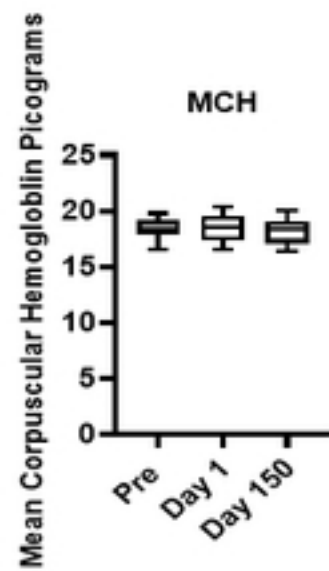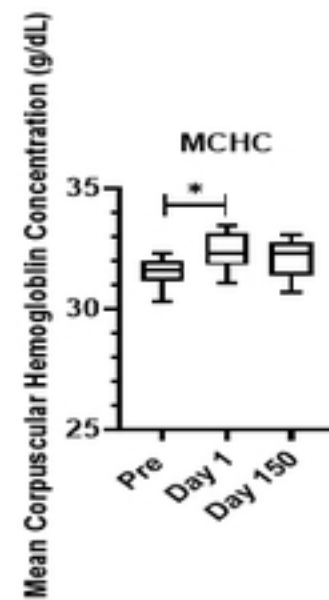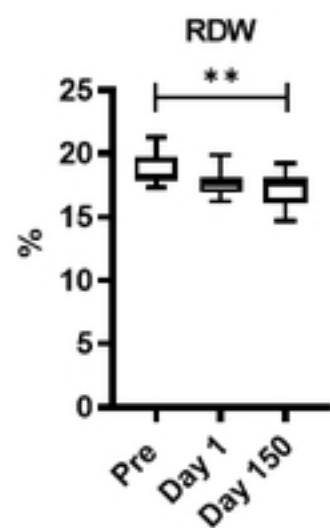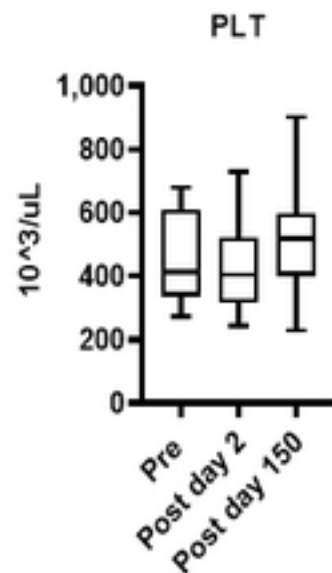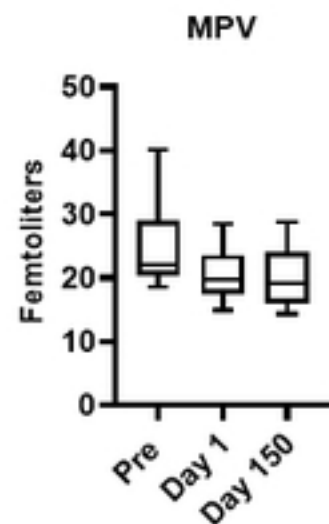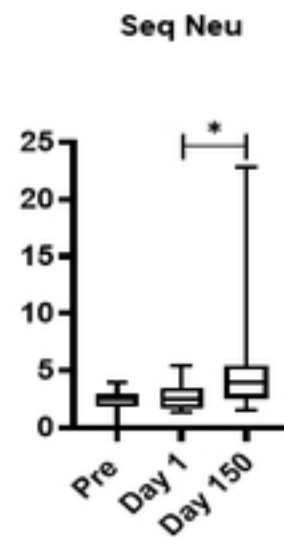

Fig 5C

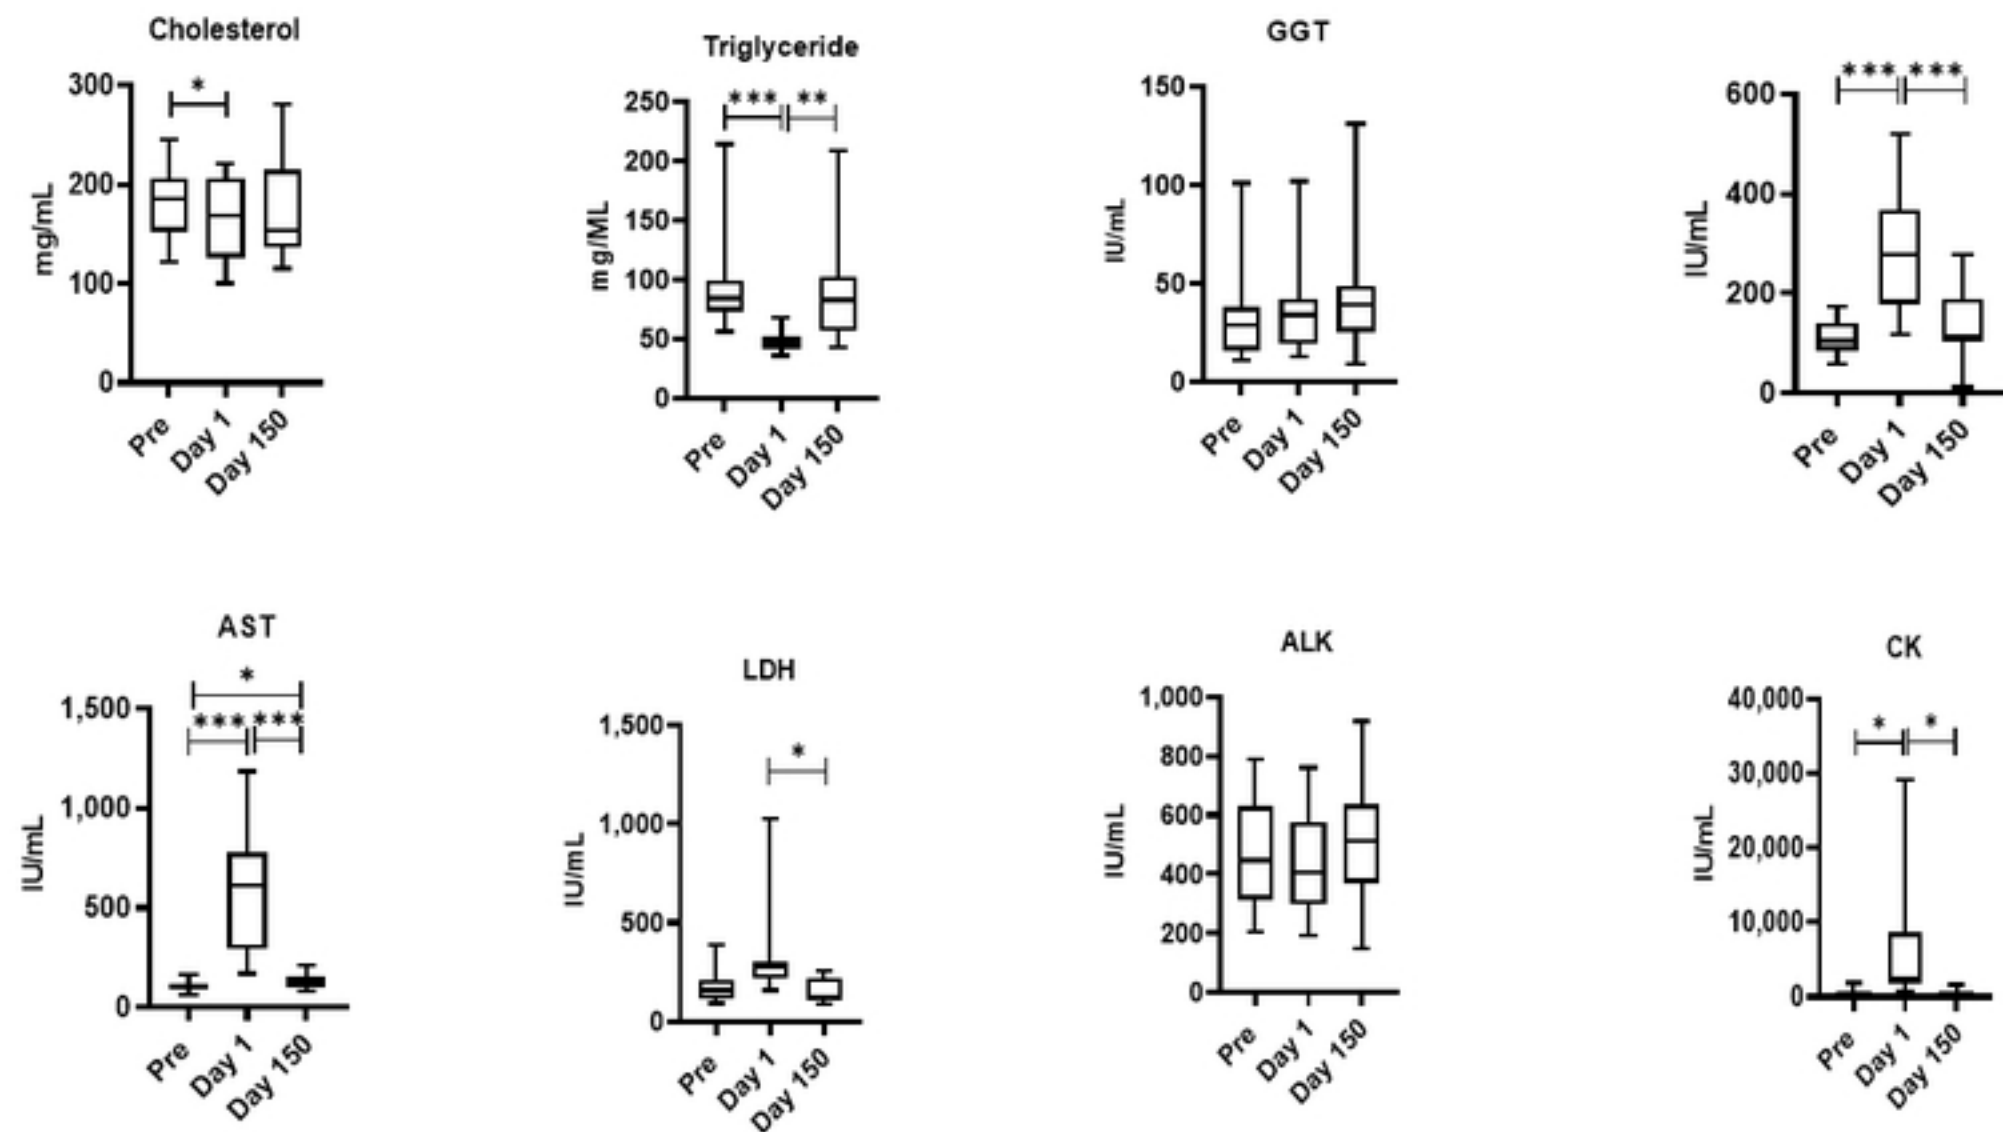

Fig 5D

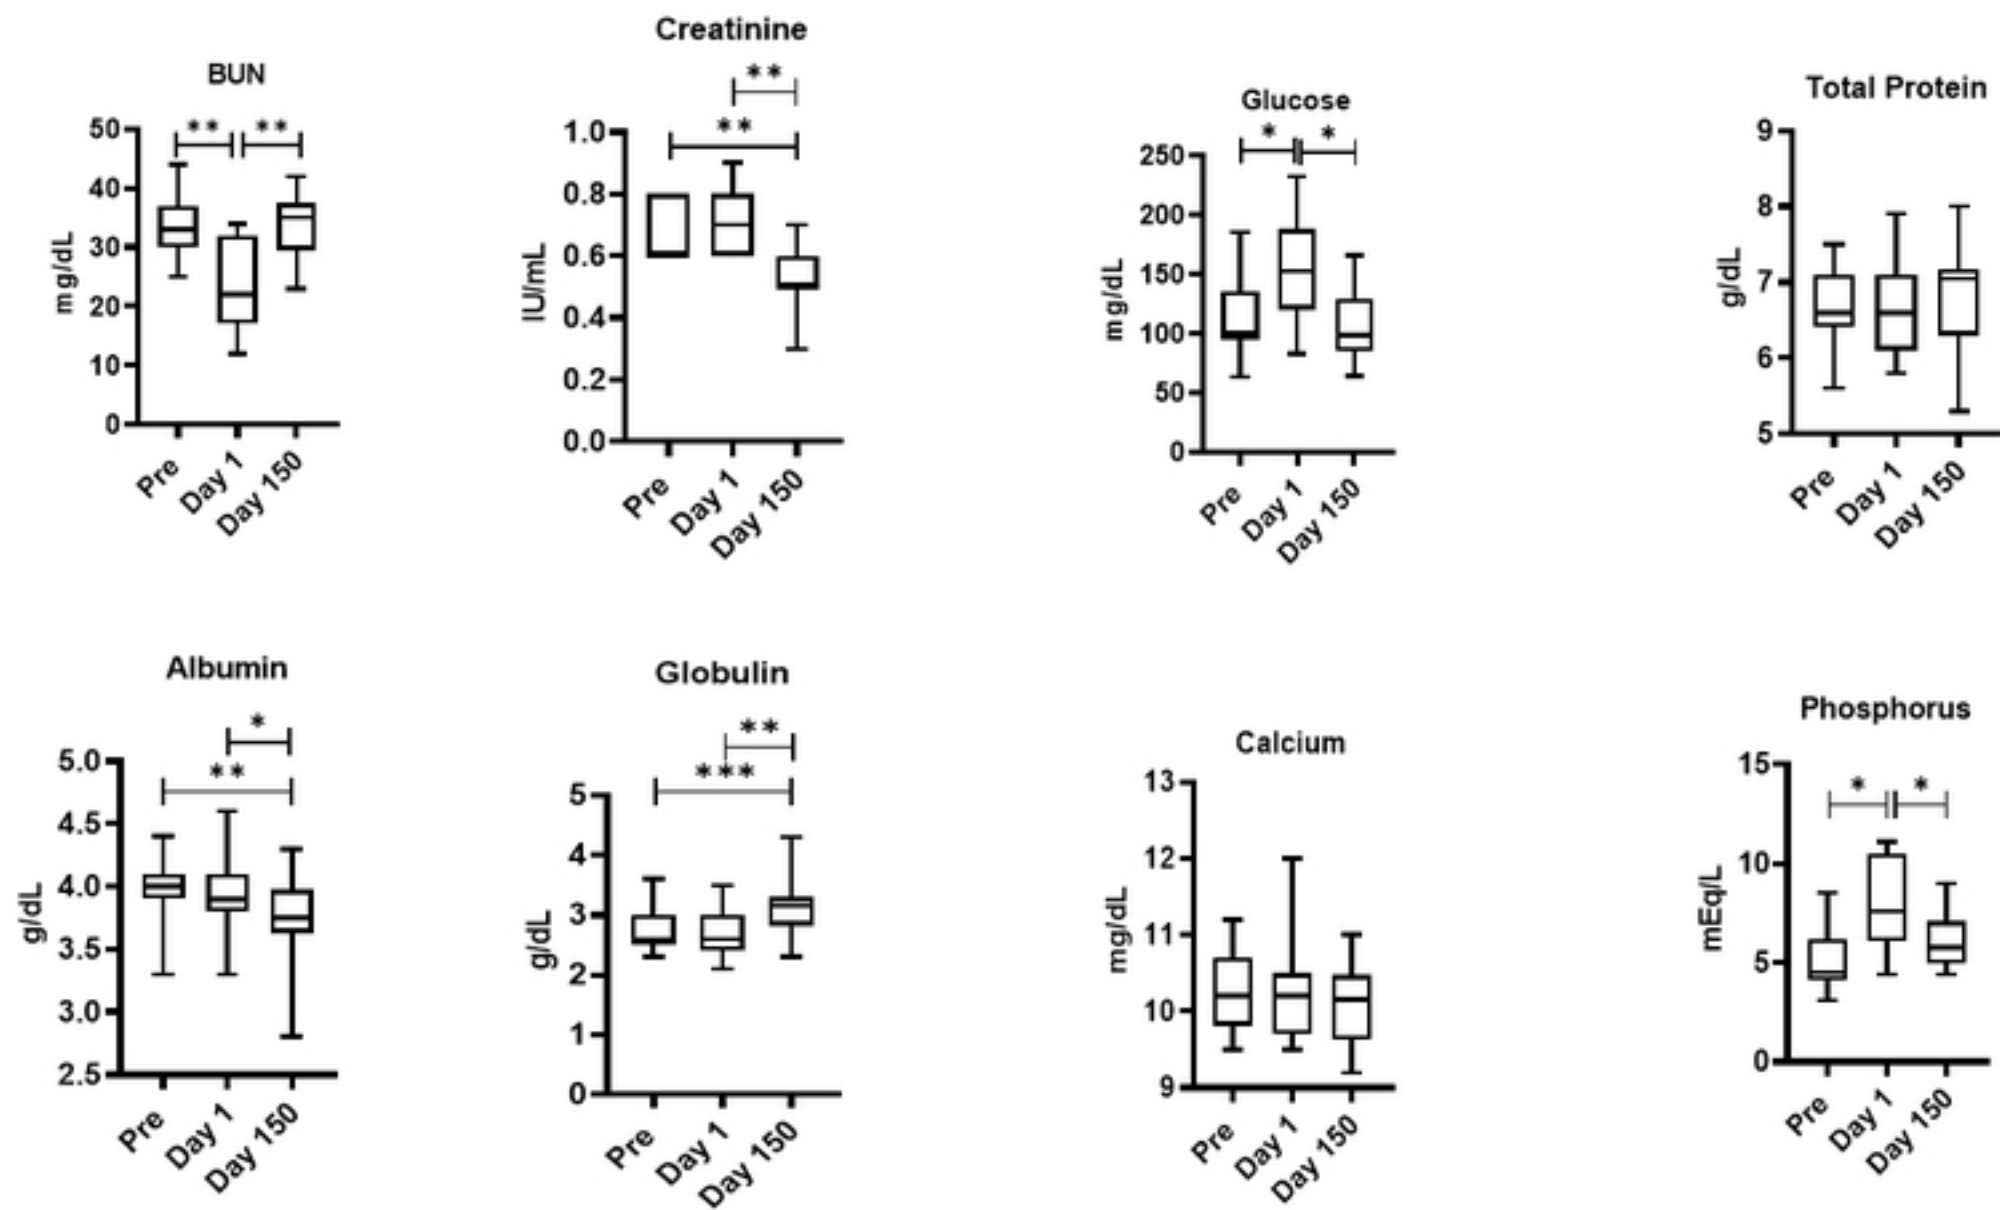

Fig 5E

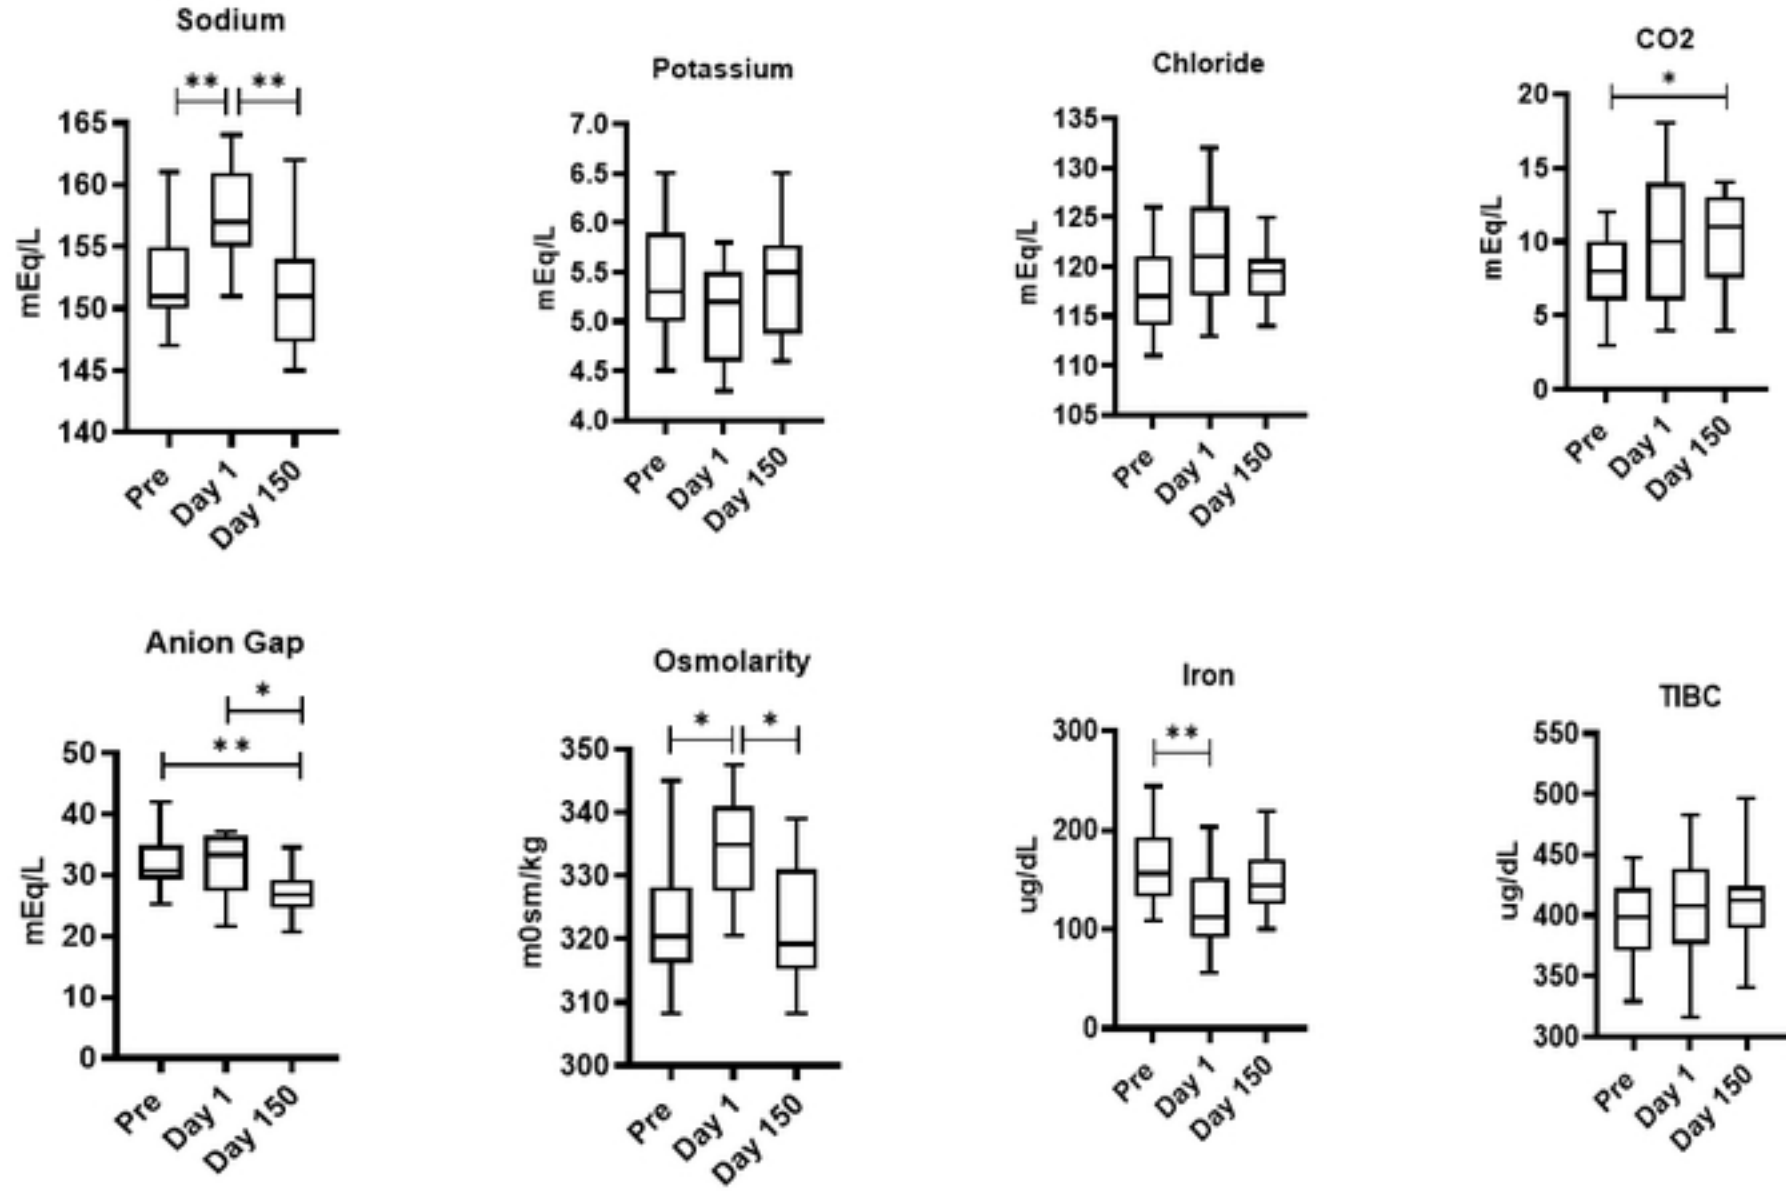

Source: https://www.biorxiv.org/content/10.1101/2020.10.02.323360v1.full.pdf
